# Supplementary material for: On the performance of the M–C (M = Fe, Ru, Os) unit toward methane activation
Source: Royal Society of Chemistry journal article supplement (doi:10.1039/d3cp02894a), 2023-01-01
Supplement: d3cp02894a1.pdf [file d3cp02894a1.pdf]

## **On the performance of the M-C (M = Fe, Ru, Os) unit toward gas-phase methane activation**

Shihan Li, Xiao-Nan Wu\* and Shaodong Zhou\*

---

*S. Li and Dr. S. Zhou*

*College of Chemical and Biological Engineering, Zhejiang Provincial Key Laboratory of Advanced Chemical Engineering Manufacture Technology, Zhejiang University, 310027 Hangzhou (P. R. China);*

*Zhejiang Provincial Innovation Center of Advanced Chemicals Technology, Institute of Zhejiang University - Quzhou, 324000 Quzhou (P.R. China)*

*E-mail: szhou@zju.edu.cn*

*Dr. X.-N. Wu,*

*School of Biomedical Engineering and Med-X Research Institute, Shanghai Jiao Tong University, Shanghai 200030, P.R. China.*

*E-mail: wuxiaonan@fudan.edu.cn*

*Supporting information and the ORCID identification numbers for the authors of this article can be found under: (Wu: 0000-0003-3076-8064; Zhou: 0000-0003-3048-4678)*

# Supporting Information

## Methodology

### Experimental details

The experiments were performed in a self-designed, quadrupole-ion trap mass spectrometer (see FigureS1) as described elsewhere.<sup>1,2</sup> The Metal-carbide cluster ions  $MC^+$  ( $M = Os$  and  $Ru$ ) are generated by pulsed laser (532 nm, Nd:YAG) ablation of a rotating and translating solid target (compressed metal and graphite powder (1:2; volume ratio)) in the presence of Ar carrier gas (99.999%) with a stationary backing pressure of 0.5 MPa. The carrier gas is controlled by pulsed valves. The ions are sent into the quadrupole mass filter through a 5 mm diameter hole of a skimmer, and then the ions are guided into the ion trap (also the reaction cell) through a 5 mm diameter hole of the electric shielding plate and react with  $CH_4$  or  $CD_4$  or  $^{13}CH_4$  (reaction time is 10 ms), which is introduced into the reaction cell *via* a leak valve; the experimental uncertainty on the pressure measurement was assumed to be 15% as induced by reading error of the ion gauge (The KJLC 392 type from Kurt J. Lesker Company). Thermalization of the ions is performed in advance by Ar gas that is continuously introduced into the reaction cell; cooling gas pressure of up to  $2 \times 10^{-3}$  Pa and cooling time of 10 ms were used to ensure efficient cooling of the ions. The reaction delay was assumed to be constant. The mass-selection, reaction and mass analysis are all performed in the ion trap.

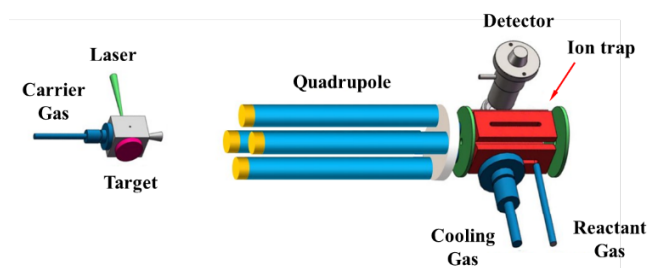

Figure S1 Schematic diagram of the experimental setup.

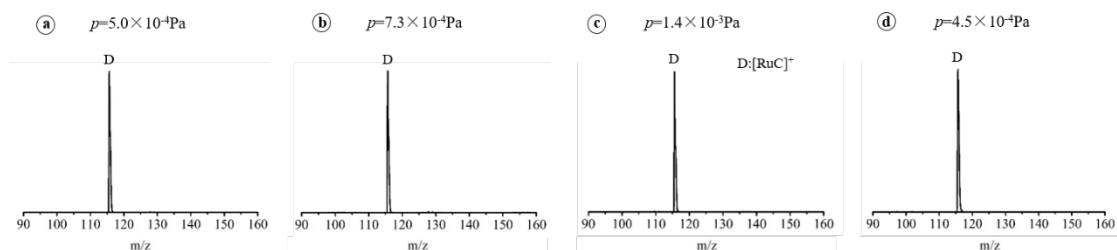

Figure S2 Mass spectra of the thermal reactions of mass-selected  $RuC^+$  ( $m/z=116$ ) with (a)  $CH_4$ , (b)  $CD_4$ , (c)  $^{13}CH_4$  and (d) Ar.

### Computational details

In order to select an appropriate density functional for the  $[OsC]^+/CH_4$  reaction system, a benchmark study was performed using the bond dissociation energies (BDEs) of  $[Os-H]^+$ ,  $[Os-C]^+$ ,  $[Os-CH]^+$ ,  $[Os-CH_2]^+$ ,  $[Os-CH_3]^+$ ,  $[Ru-H]^+$ ,  $[Ru-C]^+$ ,  $[Ru-CH]^+$ ,  $[Ru-CH_2]^+$  and  $[Ru-CH_3]^+$  as criteria (see Table S1 and Table S2). PBE0-D3(BJ) turned out to outperform the others

and was thus used for optimization and frequency analysis. Thus, the structural optimization and frequency analysis were performed at the PBE0-D3(BJ)/def2-TZVP level of theory using the Gaussian 09<sup>3</sup> program. More accurate single-point energies were obtained at the DLPNO-CCSD(T)/def2-TZVPP level of theory. Unrestricted DFT formalisms were used for the open-shell species. Calculations of single-point energies, MECP and the SOC constant were performed with the ORCA 5.0<sup>4</sup> package. Stationary points were optimized without symmetry constraint, and their nature was confirmed by vibrational frequency analysis. Intrinsic reaction coordinate (IRC)<sup>5-7</sup> calculations were also performed to link transition structures with the respective intermediates. Unscaled vibrational frequencies were used to correct the relative energies for zero-point vibrational energy (ZPVE) contributions. The quasi-restricted orbitals were used for the frontier molecular orbital analysis. Natural bond orbital (NBO)<sup>8-13</sup> calculations were performed to obtain further information on selected stationary points along the reaction paths. The MECP was searched and optimized on the PES using the Surf Cross Opt strategy in ORCA. The analysis of the spin-orbit coupling (SOC) constant at the minimum energy crossing point (MECP) are at the PBE0-D3(BJ)/def2-TZVP level. The Molecular polarity index and Multi-center bond order analysis were generated using Multifwn<sup>14</sup> program.

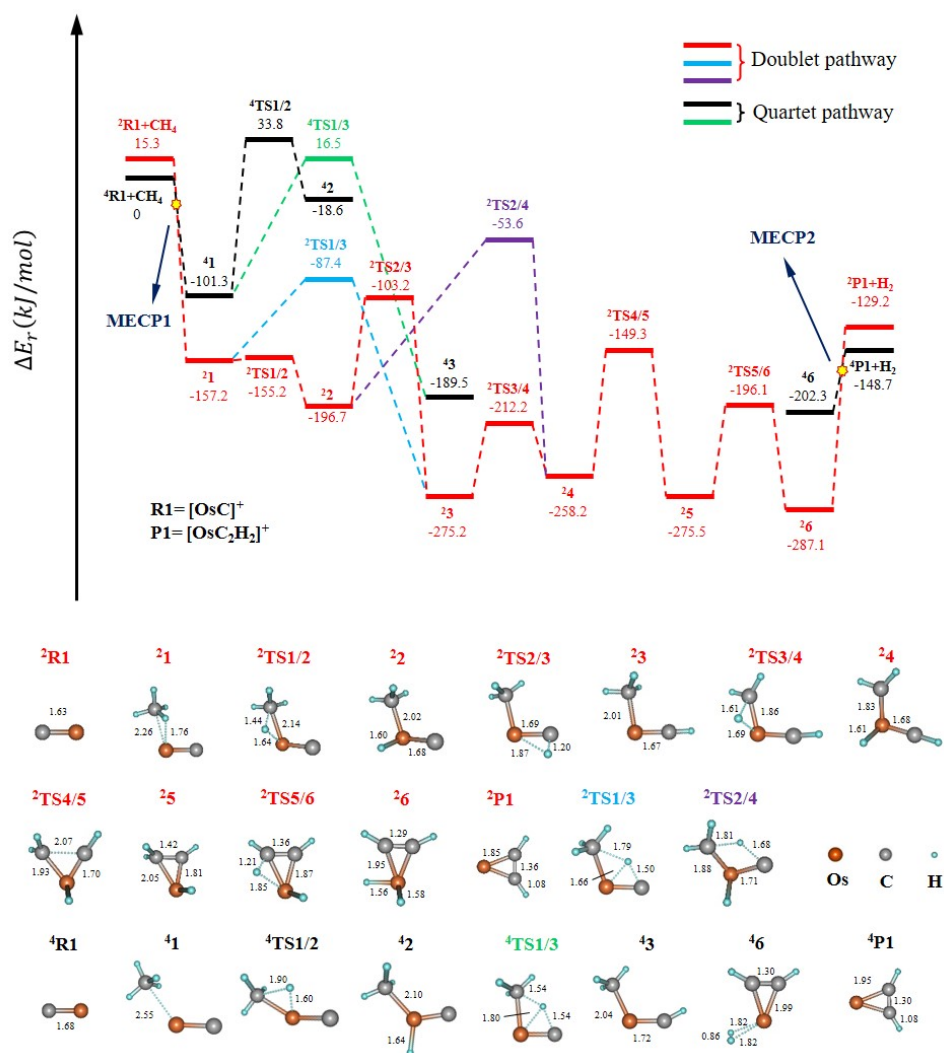

The reaction processes of  $[\text{OsC}]^+$  with  $\text{CH}_4$  are shown in Figure S3. A possible process from intermediate  ${}^2\mathbf{2}$  to intermediate  ${}^2\mathbf{4}$  is supplemented by the transfer of the hydrogen atom from the methyl group to the carbon atom. Obviously, this process is likewise not thermodynamically optimal due to its high energy of intermediate  ${}^2\text{TS}2/4$ . In addition,  ${}^4[\text{OsC}]^+$  is unable to cross the activation energy barrier of the initial C-H bond to activate methane, either by a three-center activation ( ${}^4\mathbf{1} \rightarrow {}^4\text{TS}1/2 \rightarrow {}^4\mathbf{2}$ ) or a four-center activation process ( ${}^4\mathbf{1} \rightarrow {}^4\text{TS}1/3 \rightarrow {}^4\mathbf{3}$ ). Therefore,  ${}^4[\text{OsC}]^+$  has no ability to activate methane.

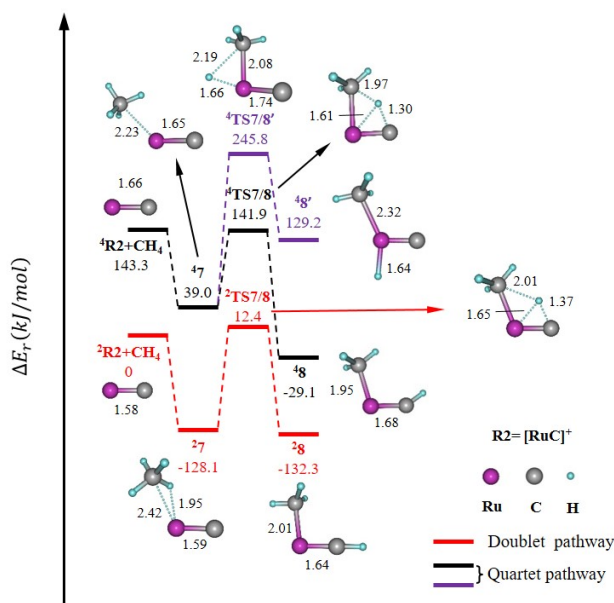

**Figure S4** The detailed potential energy profiles of the reaction of  $[\text{RuC}]^+$  with  $\text{CH}_4$ .

The reaction processes of  $[\text{RuC}]^+$  with  $\text{CH}_4$  are shown in Figure S4. From this pathway, neither  ${}^2[\text{RuC}]^+$  with the lowest energy nor  ${}^4[\text{RuC}]^+$  with the sub-lowest energy crosses the activation energy barrier of the initial C-H bond to activate methane. Thus, the  $[\text{RuC}]^+$  is incapable of activating methane.

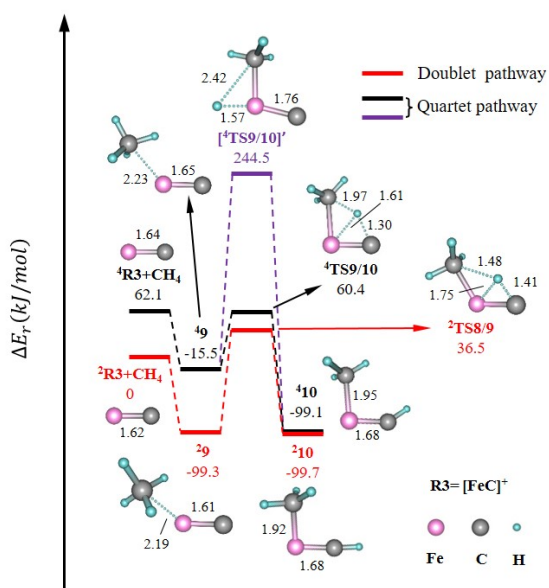

**Figure S5** The detailed potential energy profiles of the reaction of  $[\text{FeC}]^+$  with  $\text{CH}_4$ .

The reaction processes of  $[\text{FeC}]^+$  with  $\text{CH}_4$  are shown in Figure S5. From this pathway, neither  $^2[\text{FeC}]^+$  with the lowest energy nor  $^4[\text{FeC}]^+$  with the sub-lowest energy crosses the activation energy barrier of the initial C-H bond to activate methane. Thus, the  $[\text{FeC}]^+$  is incapable of activating methane.

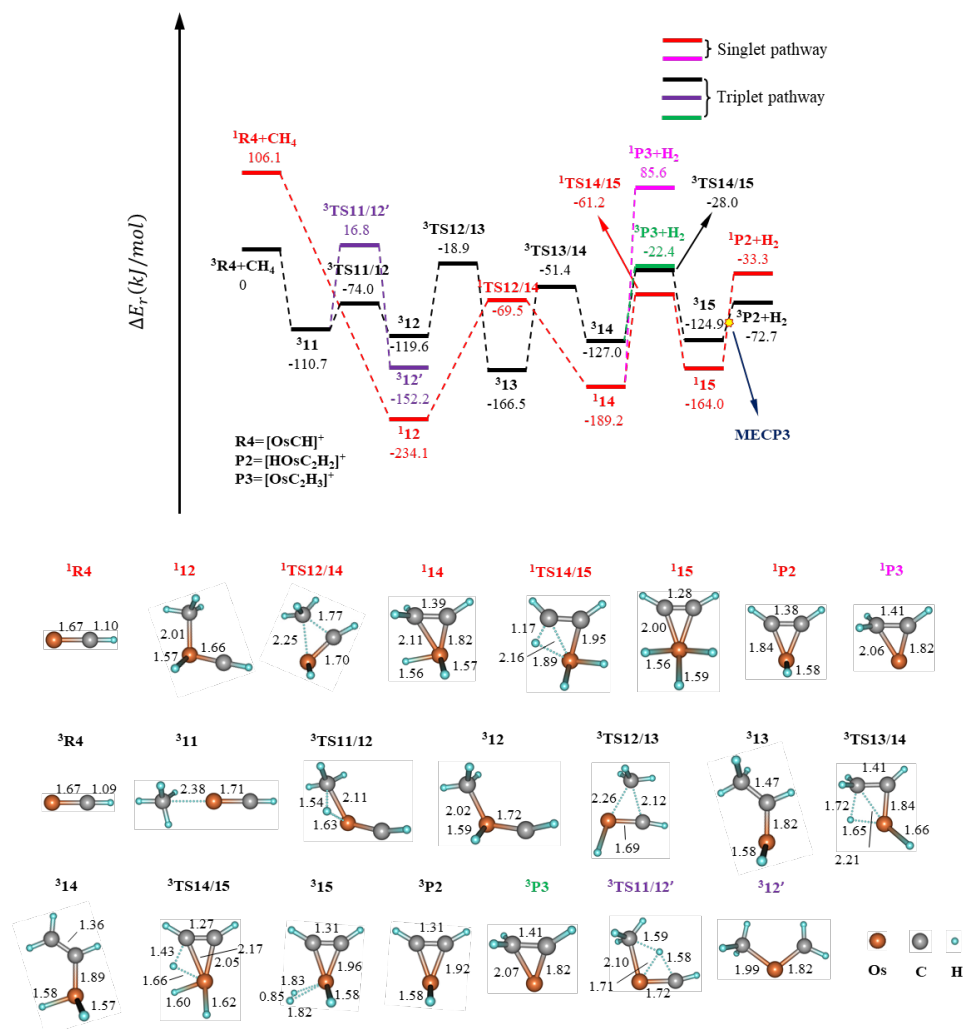

**Figure S6** The detailed potential energy profiles of the reaction of  $[\text{OsCH}]^+$  with  $\text{CH}_4$ .

The reaction processes of  $[\text{OsCH}]^+$  with  $\text{CH}_4$  are shown in Figure S6. The reaction of  $[\text{OsCH}]^+$  with  $\text{CH}_4$  is carried out in the singlet pathway. Similar to the reaction of  $[\text{OsC}]^+$  with  $\text{CH}_4$ , the Os atom is inserted directly between the  $\text{H}_3\text{C-H}$  bond ( $^1\text{R4} \rightarrow ^1\text{I2}$ ). Next, the  $\text{CH}_3$  moiety and the hydrogen atom from  $\text{CH}_3$  moiety are transferred simultaneously to form C-C, Os-C and Os-H bonds ( $^1\text{I2} \rightarrow ^1\text{I4}$ ). This is followed by a third transfer of hydrogen from the so-formed methylene to Os ( $^1\text{I3} \rightarrow ^1\text{I4}$ ), and eventually molecular hydrogen can be eliminated from the complex ( $^1\text{I4} \rightarrow ^3\text{P2}$ ). Here, another spin flip may precede at **MECP3** to eventually afford  $^3\text{P2}$ , as the latter is energetically more stable than its singlet electromer.

However, the reaction pathways for the  $^3[\text{OsCH}]^+/\text{CH}_4$  are diverse. There are two pathways: the insertion into  $\text{H}_3\text{C-H}$  bond by Os atom and four-center activation of  $\text{CH}_4$  by inserting OsC unit into  $\text{H}_3\text{C-H}$  bond, and the latter is incapable due to the high energy of intermediate  $^3\text{TS11/12}'$ . Furthermore, the subsequent reaction of  $^3[\text{OsCH}]^+/\text{CH}_4$  is similar to the singlet state, except that the  $\text{CH}_3$  group and the hydrogen atom on it are transferred sequentially.

It is noteworthy that the products of hydrogen elimination in both the singlet and triplet states tend to be the more stable  $[\text{HOsC}_2\text{H}_2]^+$  (**P2**) rather than  $[\text{OsC}_2\text{H}_3]^+$  (**P3**) in thermodynamics.

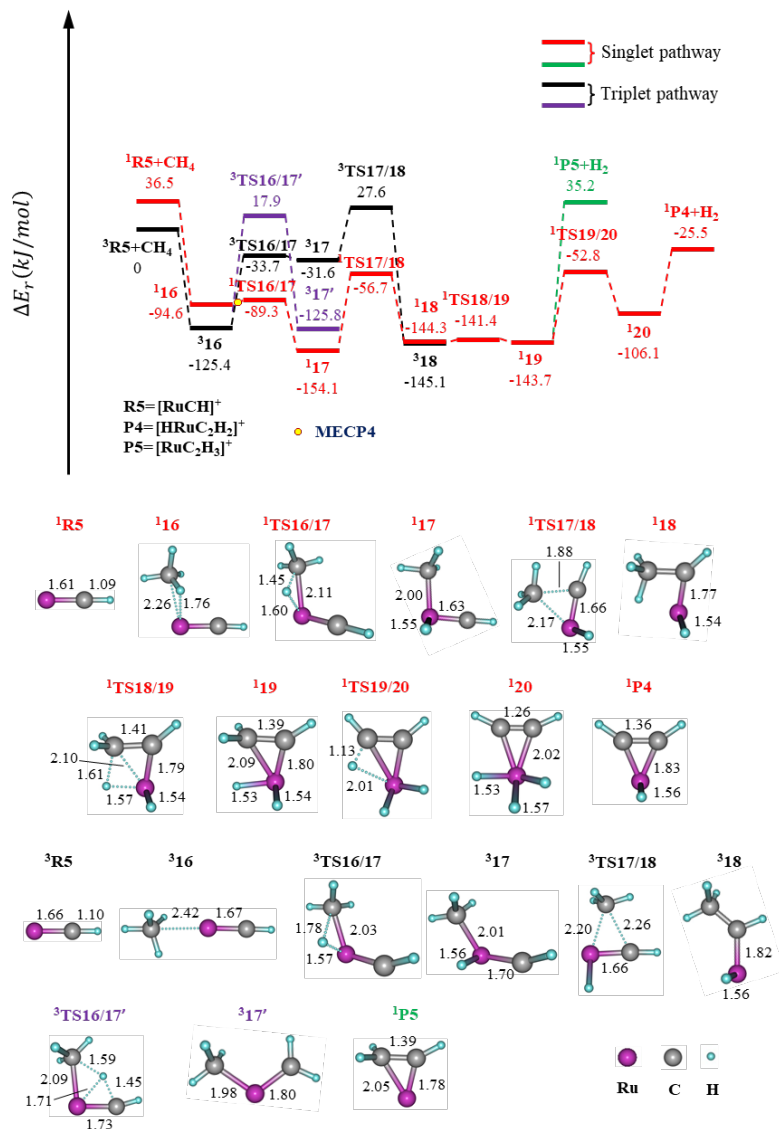

**Figure S7** The detailed potential energy profiles of the reaction of  $[\text{RuCH}]^+$  with  $\text{CH}_4$ .

The reaction processes of  $[\text{RuCH}]^+$  with  $\text{CH}_4$  are shown in Figure S7. From the pathway, a surface crossing from the triplet state to the singlet state surface (**MECP4**) must occur to form the intermediate  $^1\text{TS16/17}$  during the insertion of Ru atom into  $\text{H}_3\text{C-H}$  bond. The reaction then proceeds with the transfer of the so-formed methyl group from Ru atom to CH moiety ( $^1\text{17} \rightarrow ^1\text{18}$ ) to form the  $\eta^1\text{-CH}_3\text{CH}$  ligand. Next, with two more transfers of hydrogen atom from the  $\text{CH}_3$  group to the Ru atom ( $^1\text{18} \rightarrow ^1\text{19} \rightarrow ^1\text{20}$ ), the intermediate  $^1\text{20}$  containing three Ru-H bonds is formed. Finally, with the elimination of hydrogen, the product of three hydrogen atoms evenly distributed at Ru and C atoms is produced. Consistent with  $[\text{OsCH}]^+$ , the dehydrogenation product of  $[\text{RuCH}]^+$  with methane is thermodynamically optimal for  $[\text{HRuC}_2\text{H}_2]^+$  (**P4**) rather than  $[\text{RuC}_2\text{H}_3]^+$  (**P5**) due to the lower energy of the former.

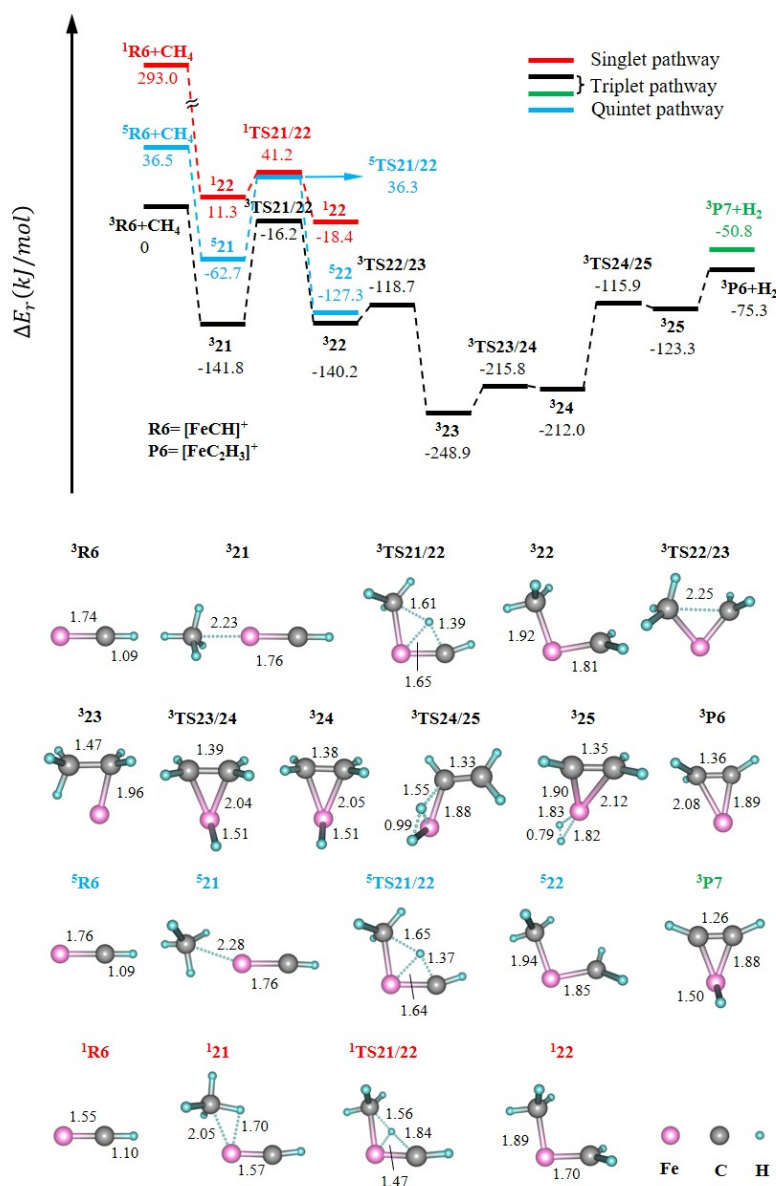

**Figure S8** The detailed potential energy profiles of the reaction of  $[\text{FeCH}]^+$  with  $\text{CH}_4$ .

The reaction processes of  $[\text{FeCH}]^+$  with  $\text{CH}_4$  are shown in Figure S8. In contrast to the process of methane activation by  $[\text{RuC}]^+$  and  $[\text{OsC}]^+$ , the best way to activate the initial  $\text{H}_3\text{C-H}$  bond of  $[\text{FeCH}]^+$  with  $\text{CH}_4$  is the four-center activation, meaning that FeC unity will be inserted into the  $\text{H}_3\text{C-H}$  bond. With the transfer of  $\text{CH}_3$  moiety ( ${}^3\text{22} \rightarrow {}^3\text{23}$ ) and the transfer of hydrogen atom ( ${}^3\text{23} \rightarrow {}^3\text{24}$ ), the intermediate  ${}^3\text{24}$  is formed, which is similar to the corresponding process for  $[\text{RuC}]^+$ . Next, with one more transfer of hydrogen atom ( ${}^3\text{24} \rightarrow {}^3\text{25}$ ) and the elimination of molecular hydrogen ( ${}^3\text{25} \rightarrow {}^3\text{P6} + \text{H}_2$ ), the final product  $[\text{FeC}_2\text{H}_3]^+$  ( ${}^3\text{P6}$ ) is produced. It is worth noting that  $[\text{FeC}_2\text{H}_3]^+$  ( ${}^3\text{P6}$ ) prefers to be the dehydrogenation product of  $[\text{FeCH}]^+$  with methane rather than  $[\text{HFeC}_2\text{H}_2]^+$  ( ${}^3\text{P7}$ ), which is the contrary to the optimal dehydrogenation product of the reaction of  $[\text{RuCH}]^+$  and  $[\text{OsCH}]^+$  with activated methane.

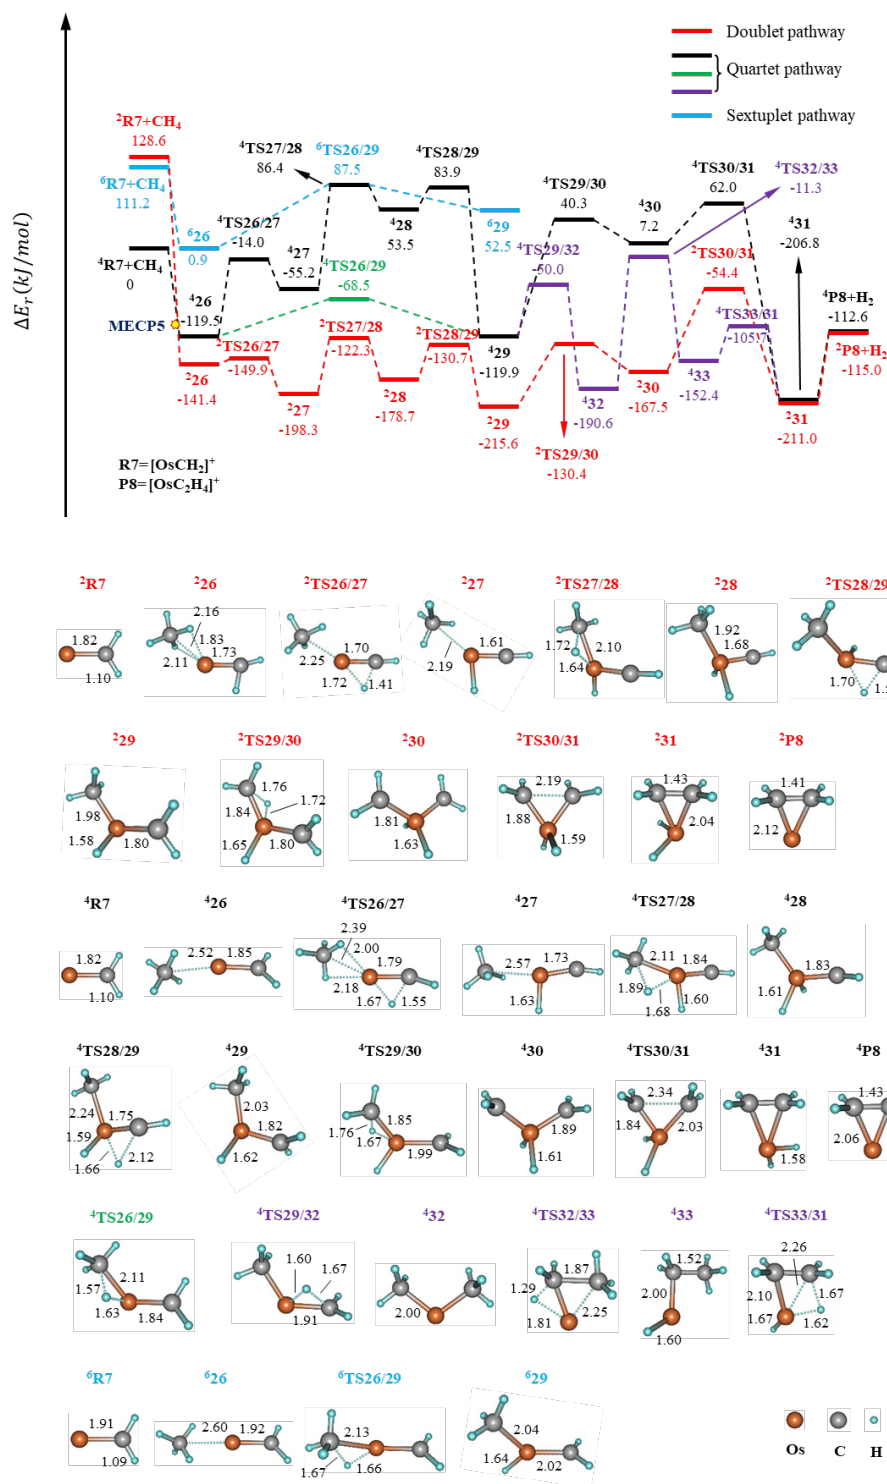

**Figure S9** The detailed potential energy profiles of the reaction of  $[\text{OsCH}_2]^+$  with  $\text{CH}_4$

The reaction processes of  $[\text{OsCH}_2]^+$  with  $\text{CH}_4$  are shown in Figure S9. From the pathway, a surface crossing must occur from the quartet state to the doublet state surface in order to form the encounter complex  ${}^{\text{R}}\text{R7}$  of the  $[\text{OsCH}_2]^+/\text{CH}_4$  couple. The  $[\text{OsCH}_2]^+/\text{CH}_4$  reaction pathway passes through transformation of hydrogen atom ( ${}^{\text{R}}\text{R7} \rightarrow {}^{\text{R}}\text{R7}$ ) to form the intermediate  ${}^{\text{R}}\text{R7}$ . This implies that it is not the  $\text{H}_3\text{C}-\text{H}$  bond activation but the conformational transition of  $[\text{OsCH}]^+$  that takes place first, which may be due to the agostic interactions.

Consistent with the reaction of  $[\text{OsC}]^+$  with  $\text{CH}_4$ , the Os atom is inserted between the  $\text{HC}_3-$



H bond ( ${}^2\mathbf{27} \rightarrow {}^2\mathbf{28}$ ). Next, the hydrogen atom transfer from Os to carbide ligand ( ${}^2\mathbf{28} \rightarrow {}^2\mathbf{29}$ ), which is followed by a second hydrogen transfer from the so-formed methyl group to Os ( ${}^2\mathbf{29} \rightarrow {}^2\mathbf{30}$ ). With C-C coupling takes place to afford a  $\eta^2$ -CH<sub>2</sub>CH<sub>2</sub> ligand ( ${}^2\mathbf{30} \rightarrow {}^2\mathbf{31}$ ), molecular hydrogen can be eliminated from the complex ( ${}^2\mathbf{31} \rightarrow {}^2\mathbf{P8}$ ).

It is worth noting that the reaction pathways for the  ${}^4[\text{OsCH}_2]^+/\text{CH}_4$  are diverse. It can directly transfer the H atom from the methane to the carbene ligand ( ${}^4\mathbf{26} \rightarrow {}^4\mathbf{29}$ ) to form intermediate  ${}^4\mathbf{29}$ . The subsequent reaction pathway of  ${}^4[\text{OsCH}_2]^+/\text{CH}_4$  passes through transformation of hydrogen atom ( ${}^4\mathbf{29} \rightarrow {}^4\mathbf{32}$ ), transformation of CH<sub>3</sub> moiety and hydrogen atom ( ${}^4\mathbf{32} \rightarrow {}^4\mathbf{33}$ ) and one more hydrogen atom transformation ( ${}^4\mathbf{33} \rightarrow {}^4\mathbf{31}$ ) to form intermediate  ${}^4\mathbf{31}$ . With the cleavage of Os-H bonds, the product  ${}^4\mathbf{P7}$  and H<sub>2</sub> are formed. And this process ( ${}^4\mathbf{29} \rightarrow {}^4\mathbf{32} \rightarrow {}^4\mathbf{33} \rightarrow {}^4\mathbf{31}$ ) is unique to  ${}^4[\text{OsCH}_2]^+/\text{CH}_4$ .

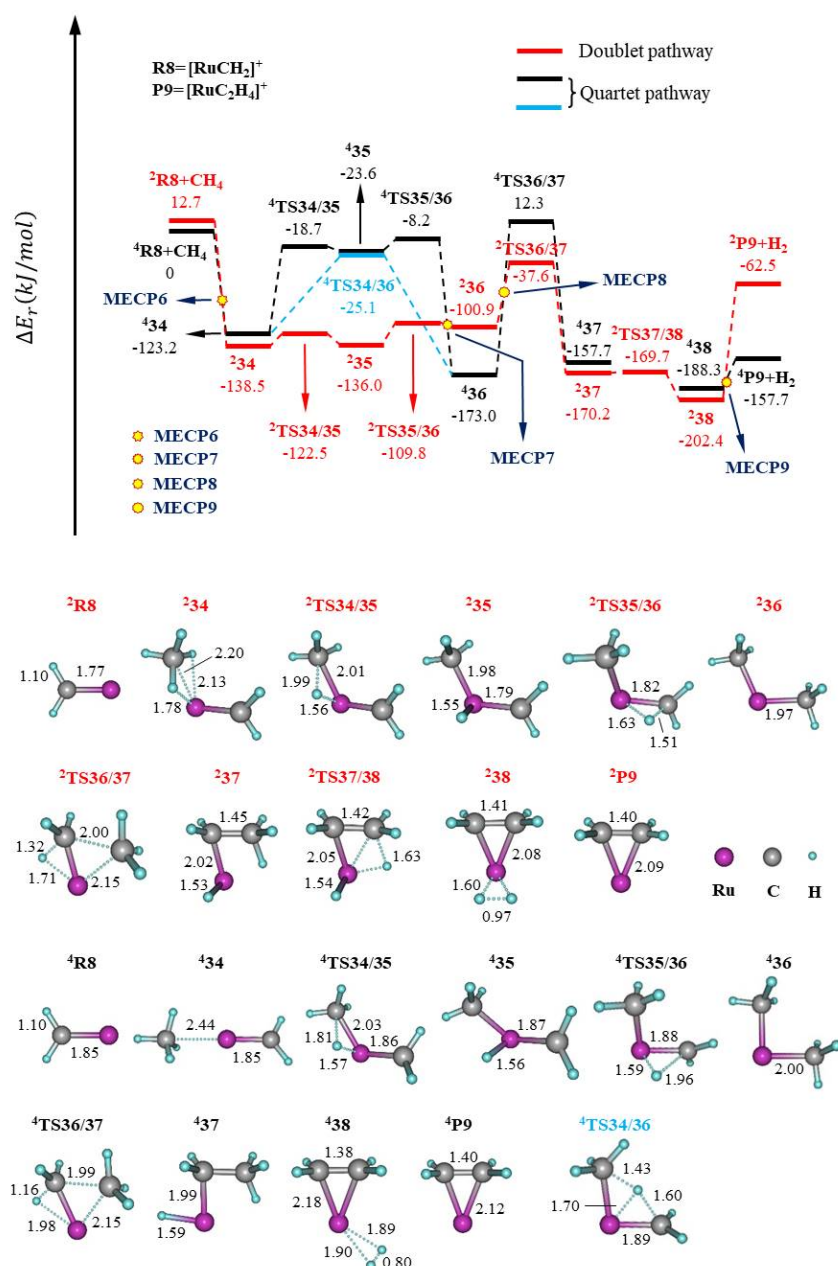

**Figure 10** Simplified PES and selected structural information for the reactions of  $[\text{RuCH}_2]^+$  with  $\text{CH}_4$  as calculated at the DLPNO-CCSD(T)/def2-TZVPP//PBE0-D3(BJ)/def2-TZVP level of theory.

For the reaction of  $[\text{RuCH}_2]^+$  and  $\text{CH}_4$ , the most energetically possible pathways are shown in Figure S10. A surface crossing must occur from the quartet state to the doublet state surface in order to form the encounter complex  ${}^2\mathbf{34}$  of the  $[\text{RuCH}_2]^+/\text{CH}_4$  couple (Figure 5)<sup>12</sup>. Similar to the  $[\text{OsCH}_2]^+/\text{CH}_4$  couple, the  $[\text{RuCH}_2]^+/\text{CH}_4$  reaction pathway also pass through transformations of two hydrogen atoms ( ${}^2\mathbf{34}\rightarrow{}^2\mathbf{35}\rightarrow{}^2\mathbf{36}$ ) and C-C coupling ( ${}^2\mathbf{36}\rightarrow{}^2\mathbf{37}$ ) to form the intermediate  ${}^2\mathbf{37}$ . With one more hydrogen atom transformation ( ${}^2\mathbf{37}\rightarrow{}^2\mathbf{38}$ ) and cleavage of Os-H bonds, the the final product ( ${}^4[\text{RuC}_2\text{H}_4]^+$  and  $\text{C}_2\text{H}_2$ ) are formed. It's worth noting that dehydrogenation step involves two spin conversions from the quartet state to the doublet state. It should be noted that one PES in the quartet state is more stable, *i.e.*  ${}^2\mathbf{36}$ . Thus, there will be four MECPs (MECP6, MECP7, MECP8 and MECP9) in the pathway, which means four spin conversions between different states. In addition, an energy number -100.9 kJ/mol of  ${}^2\mathbf{36}$  is within the computational error.

The activation of methane by the  ${}^4[\text{RuCH}_2]^+$  process also has an initial activation process similar to that of  $[\text{FeCH}_2]^+$ , *i.e.* the transfer of the hydrogen atom to the C ligand ( ${}^4\mathbf{34}\rightarrow{}^4\text{TS34/36}\rightarrow{}^4\mathbf{36}$ ). In contrast, the  ${}^2[\text{RuCH}_2]^+$  does not have a similar activation process, which may be due to the low spin density of Ru.

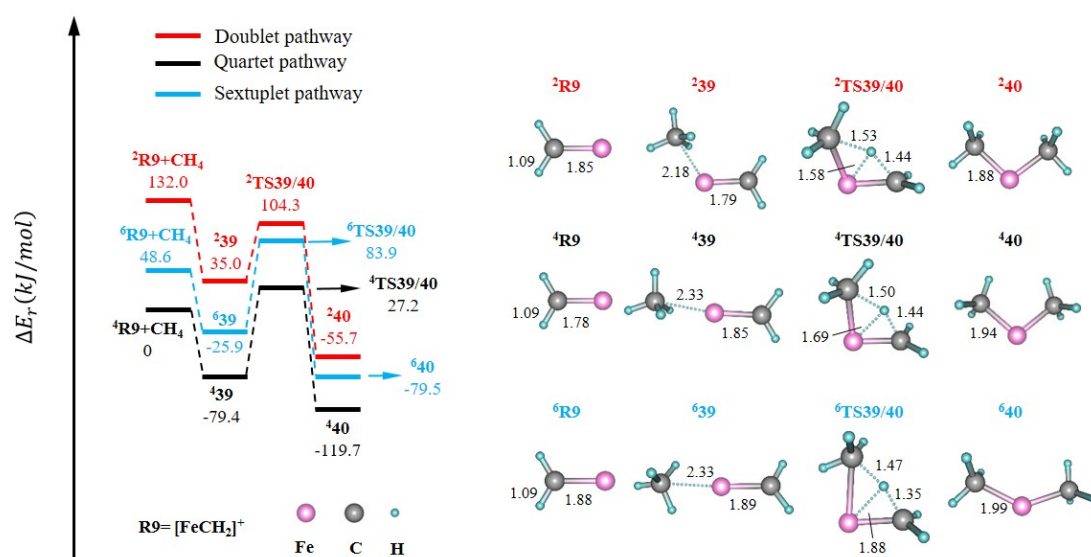

**Figure S11** Simplified PES and selected structural information for the reactions of  $[\text{FeCH}_2]^+$  with  $\text{CH}_4$  as calculated at the DLPNO-CCSD(T)/def2-TZVPP//PBE0-D3(BJ)/def2-TZVP level of theory.

From the pathways in Figure S11,  $[\text{FeCH}_2]^+$  activate the initial  $\text{H}_3\text{C-H}$  bond of methane in a similar way to  $[\text{FeC}]^+$ , by transferring H from methane to the C ligand ( $\mathbf{39}\rightarrow\mathbf{40}$ ). And  $[\text{FeCH}_2]^+$  cannot cross the energy barrier of the initial  $\text{H}_3\text{C-H}$  to activate  $\text{CH}_4$ , in either state.

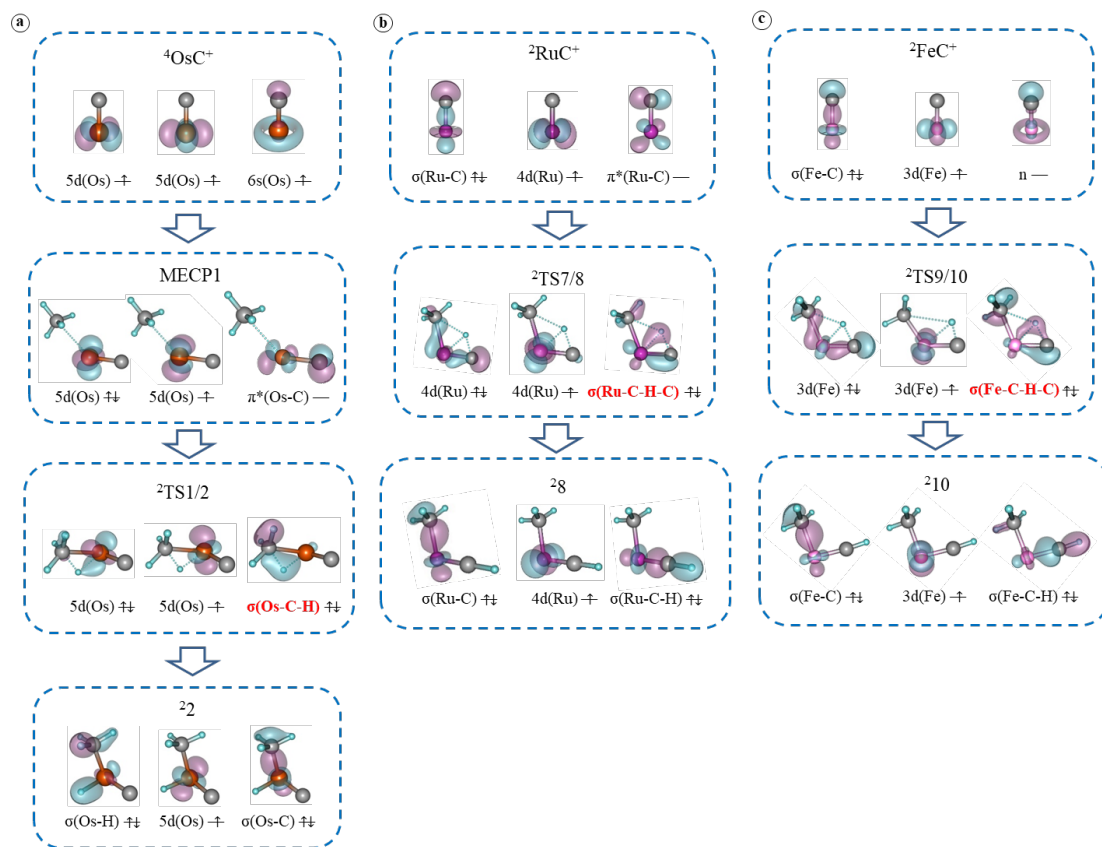

**Figure S12** Schematic orbital diagrams represented by natural bond orbitals for the initial  $\text{H}_3\text{C-H}$  bond breaking process for the reaction of (a)  $[\text{OsC}]^+$ , (b)  $[\text{RuC}]^+$  and (c)  $[\text{FeC}]^+$  with  $\text{CH}_4$ .

Schematic representation of the frontier orbitals for  $[\text{RuC}]^+$ ,  $[\text{FeC}]^+$ ,  $[\text{OsCH}]^+$ ,  $[\text{RuCH}]^+$ ,  $[\text{FeCH}]^+$ ,  $[\text{OsCH}_2]^+$ ,  $[\text{RuCH}_2]^+$  and  $[\text{FeCH}_2]^+$  are shown in Figure S13-S20, respectively.

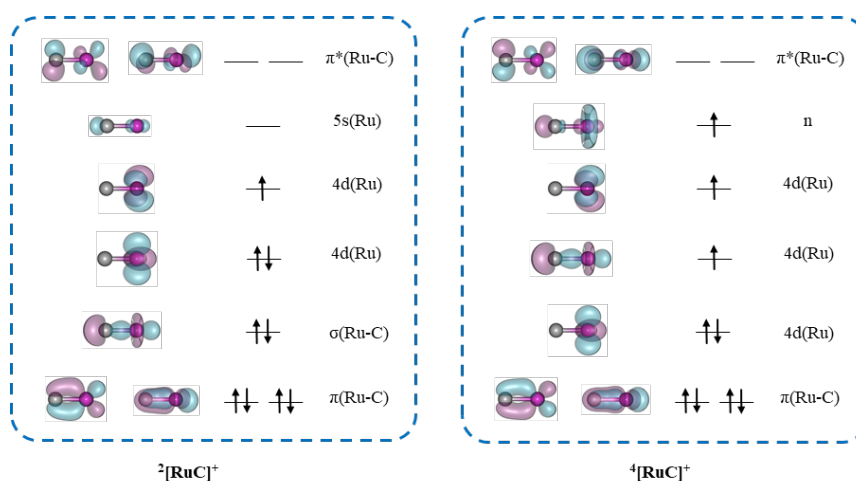

**Figure S13** Schematic representation of the frontier orbitals for  $[\text{RuC}]^+$ .

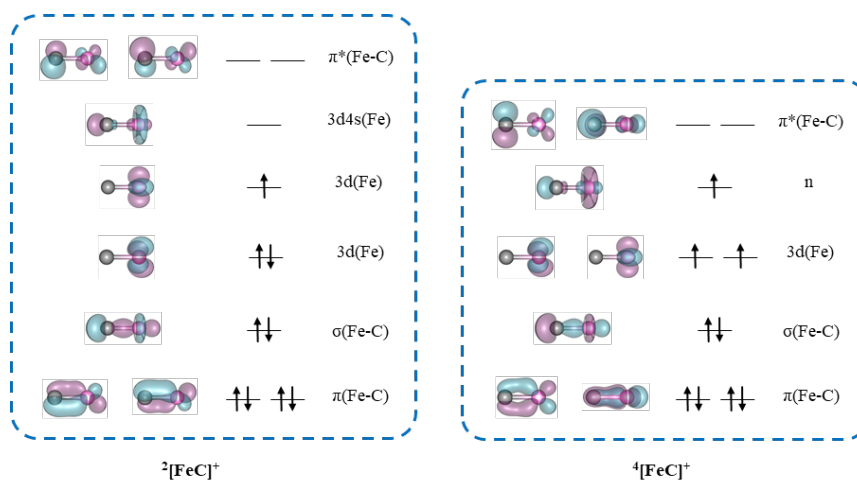

**Figure S14** Schematic representation of the frontier orbitals for  $[\text{FeC}]^+$ .

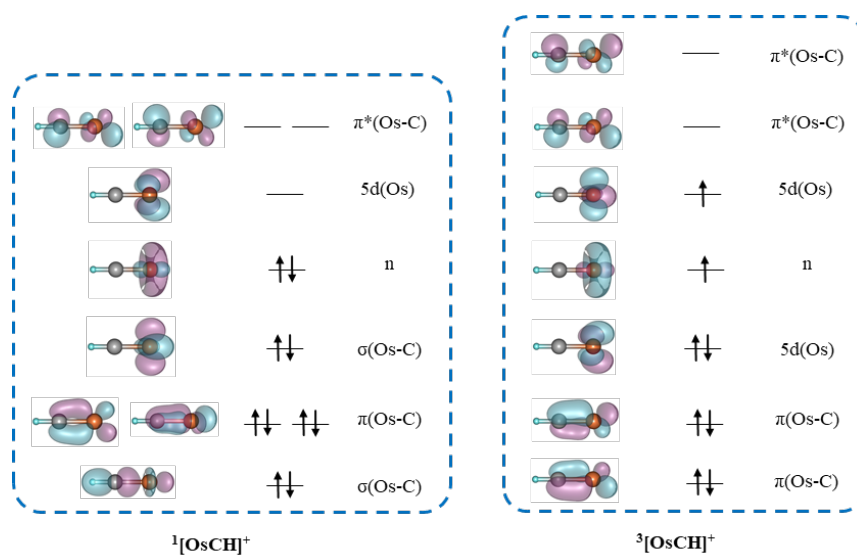

**Figure S15** Schematic representation of the frontier orbitals for  $[\text{OsCH}]^+$ .

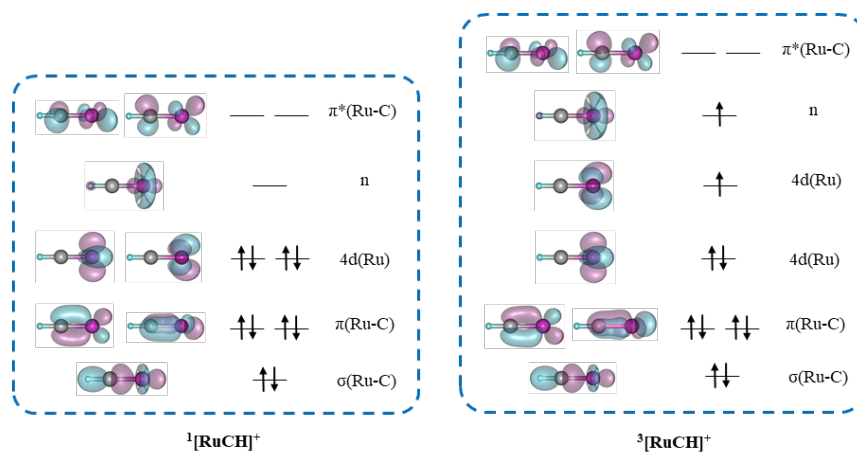

**Figure S16** Schematic representation of the frontier orbitals for  $[\text{RuCH}]^+$ .

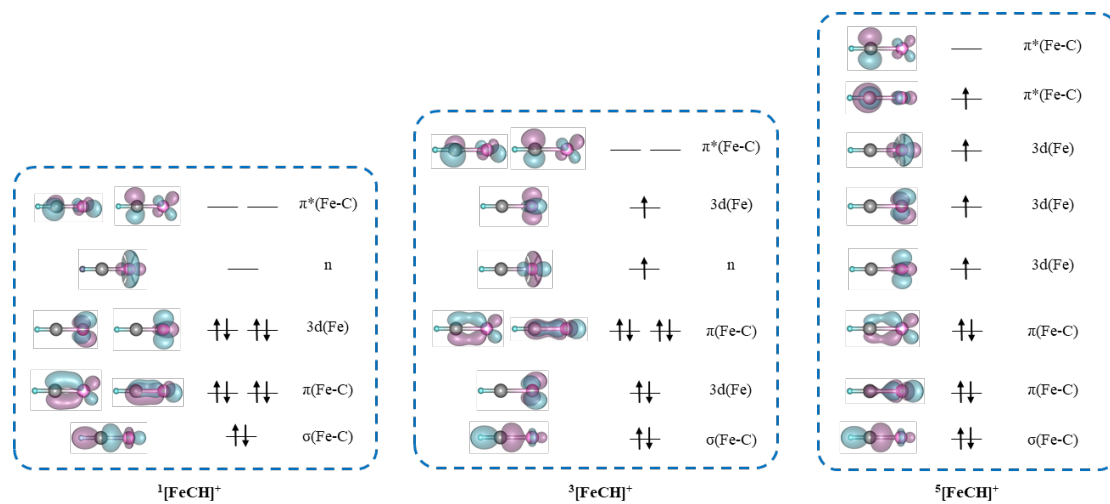

**Figure S17** Schematic representation of the frontier orbitals for  $[\text{FeCH}]^+$ .

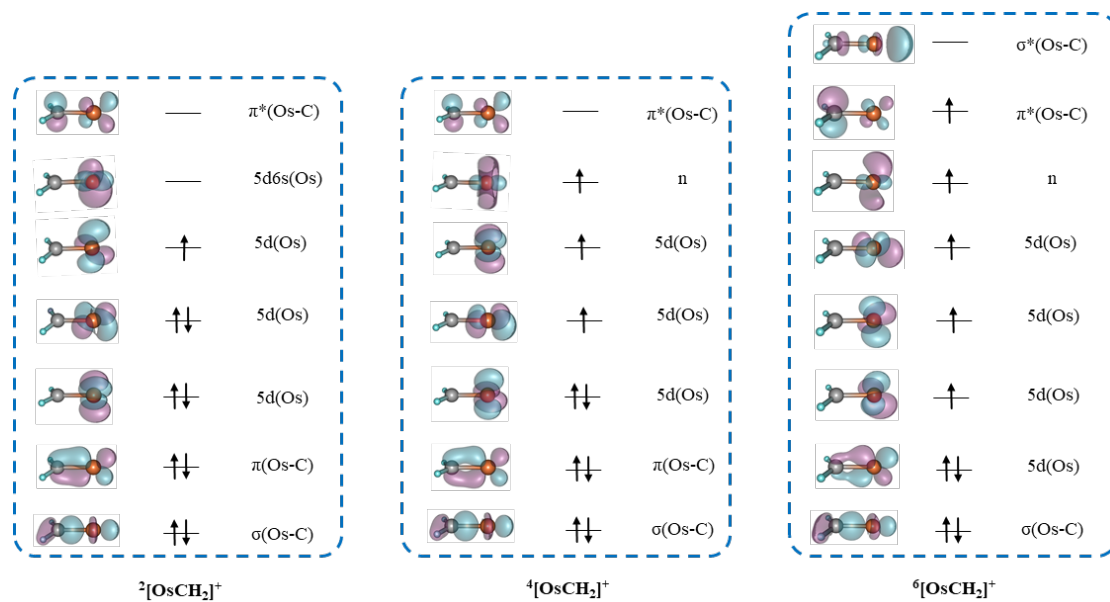

**Figure S18** Schematic representation of the frontier orbitals for  $[\text{OsCH}_2]^+$ .

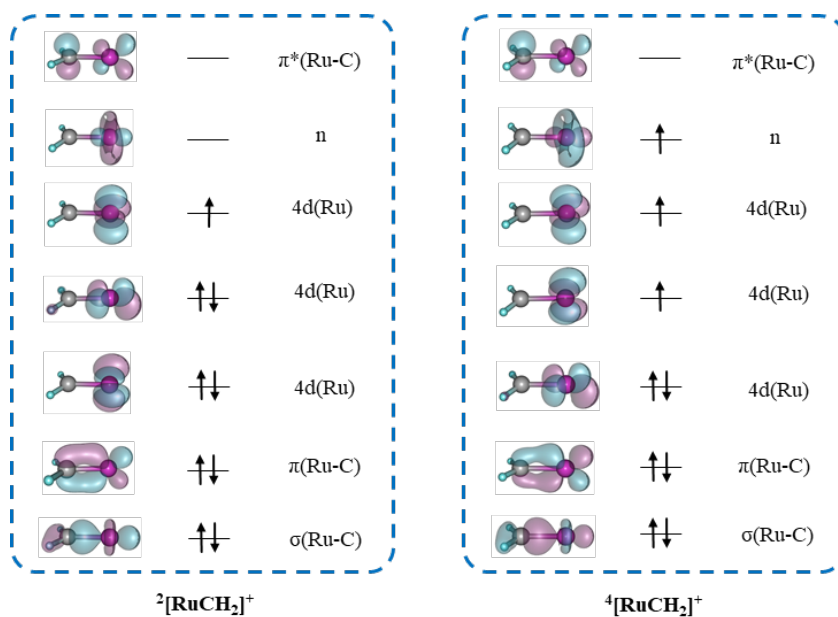

Figure S19 Schematic representation of the frontier orbitals for  $[\text{RuCH}_2]^+$ .

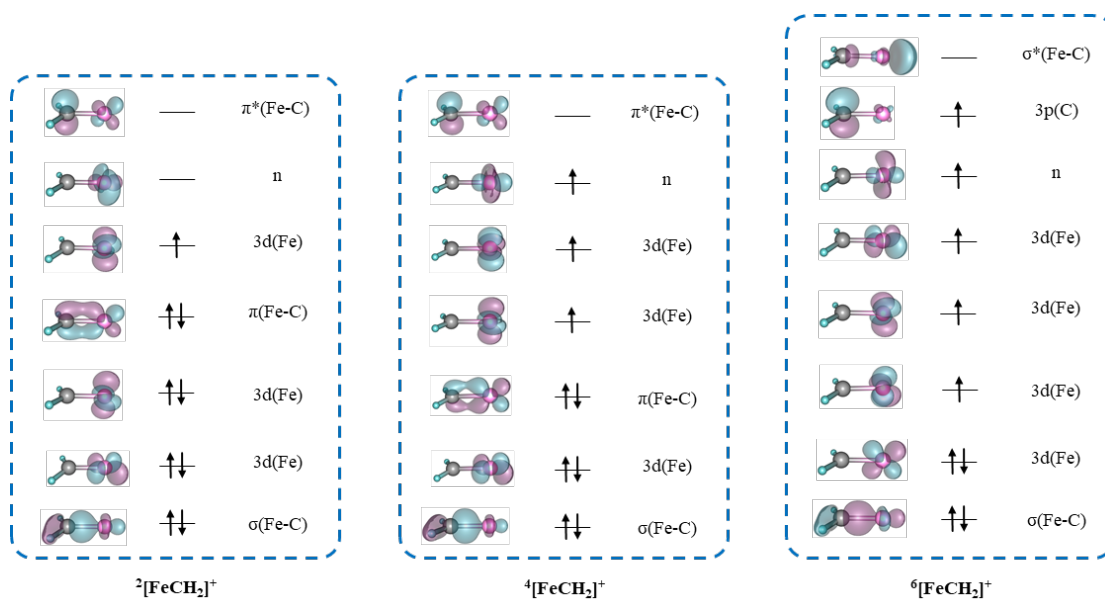

Figure S20 Schematic representation of the frontier orbitals for  $[\text{FeCH}_2]^+$ .

**Table S1.** The average errors MSE, variances RMSE and the standard deviation of SE of BDE( $[\text{Os-H}]^+$ ), BDE ( $[\text{Os-C}]^+$ ), BDE ( $[\text{Os-CH}]^+$ ), BDE ( $[\text{Os-CH}_2]^+$ ) and BDE ( $[\text{Os-CH}_3]^+$ ) for each computational method.

| method           | BCE(kJ/mol)       |                   |                    |                      |                      | average | analysis |        |                          |
|------------------|-------------------|-------------------|--------------------|----------------------|----------------------|---------|----------|--------|--------------------------|
|                  | $[\text{Os-H}]^+$ | $[\text{Os-C}]^+$ | $[\text{Os-CH}]^+$ | $[\text{Os-CH}_2]^+$ | $[\text{Os-CH}_3]^+$ |         | MSE      | RMSE   | standard deviation of SE |
| PBE0-D3(BJ)      | -7.678            | -18.108           | -13.883            | -6.725               | -29.574              | -15.194 | 249.907  | 15.808 | 8.309                    |
| revTPSS          | -8.254            | 23.045            | 16.855             | 14.741               | 17.174               | 12.712  | 232.585  | 15.251 | 10.840                   |
| mPW1PBE          | -12.474           | -31.605           | -26.920            | -20.459              | -45.685              | -27.429 | 730.809  | 27.033 | 11.164                   |
| B3PW91-D3(BJ)    | -2.794            | -11.719           | -7.255             | -1.424               | -32.418              | -11.122 | 208.459  | 14.438 | 11.245                   |
| G96LYP           | 11.292            | 35.162            | 34.420             | 38.988               | 14.386               | 26.849  | 712.597  | 26.695 | 11.586                   |
| mPW1PW91         | -12.035           | -33.804           | -29.208            | -21.488              | -46.479              | -28.603 | 793.772  | 28.174 | 11.594                   |
| mPW3PBE          | -2.859            | -7.774            | -4.024             | -1.161               | -32.498              | -9.663  | 190.380  | 13.798 | 11.622                   |
| TPSSh            | -13.725           | -12.429           | -8.979             | -7.370               | -39.306              | -16.362 | 337.125  | 18.361 | 11.698                   |
| X3LYP            | 2.947             | -19.669           | -15.342            | 7.898                | -19.764              | -8.786  | 180.648  | 13.441 | 11.815                   |
| TPSS-D3(BJ)      | -5.133            | 26.103            | 26.138             | 21.703               | 22.394               | 18.241  | 393.905  | 19.847 | 11.830                   |
| B3LYP-D3(BJ)     | 4.673             | -16.229           | -12.516            | 8.964                | -22.187              | -7.459  | 169.078  | 13.003 | 12.135                   |
| B3P86            | 14.523            | 7.372             | 11.329             | 16.274               | -21.605              | 5.579   | 187.533  | 13.694 | 13.925                   |
| B971             | 4.959             | 21.157            | 29.619             | 46.886               | 36.699               | 27.864  | 815.773  | 28.562 | 14.231                   |
| BRxp86           | 7.432             | 48.748            | 39.770             | 24.484               | 19.952               | 28.077  | 835.137  | 28.899 | 14.623                   |
| mPW1LYP          | -2.303            | -37.258           | -32.919            | -3.182               | -24.743              | -20.081 | 516.580  | 22.728 | 14.719                   |
| SOGGA11-X        | -29.571           | -45.292           | -46.768            | -5.588               | -18.078              | -29.059 | 911.839  | 30.197 | 15.804                   |
| M11              | 60.150            | 62.963            | 58.900             | 94.827               | 90.948               | 73.558  | 4719.211 | 68.697 | 15.885                   |
| B1LYP            | -3.580            | -44.661           | -40.015            | -10.062              | -32.500              | -26.164 | 794.354  | 28.184 | 16.392                   |
| BLYP-D3(BJ)      | 17.762            | 56.843            | 52.850             | 64.098               | 37.364               | 45.783  | 1974.050 | 44.430 | 16.515                   |
| $\omega$ B97X    | 4.862             | -21.042           | -5.446             | 22.428               | 22.193               | 4.599   | 248.598  | 15.767 | 16.648                   |
| CAM-B3LYP-D3(BJ) | -0.779            | -44.816           | -33.609            | -5.496               | 0.577                | -16.825 | 528.191  | 22.982 | 18.729                   |
| BP86-D3(BJ)      | 27.553            | 78.789            | 74.091             | 67.690               | 46.817               | 58.988  | 3205.027 | 56.613 | 19.143                   |

|               |         |         |         |         |         |         |          |        |        |
|---------------|---------|---------|---------|---------|---------|---------|----------|--------|--------|
| mPWPW91       | 7.949   | 61.873  | 57.504  | 44.551  | 29.836  | 40.343  | 1678.872 | 40.974 | 19.675 |
| mPWPBE        | 7.460   | 63.844  | 59.604  | 45.482  | 30.988  | 41.476  | 1785.537 | 42.256 | 20.553 |
| B2PLYP        | -54.705 | 10.754  | -30.949 | -29.337 | -21.302 | -25.108 | 896.760  | 29.946 | 21.112 |
| B2PLYP-D3(BJ) | -53.190 | 15.135  | -26.187 | -23.480 | -14.876 | -20.520 | 752.772  | 27.437 | 21.961 |
| PBEHPBE       | 9.153   | 70.898  | 66.535  | 53.486  | 37.168  | 47.448  | 2296.592 | 47.923 | 22.463 |
| PW91          | 11.936  | 75.539  | 71.279  | 57.625  | 40.876  | 51.451  | 2653.461 | 51.512 | 23.172 |
| $\omega$ B97  | 21.259  | -8.365  | 18.762  | 54.217  | 56.395  | 28.453  | 1165.633 | 34.141 | 24.273 |
| BMK-D3(BJ)    | -31.433 | -51.375 | -38.677 | 0.032   | 15.419  | -21.207 | 893.515  | 29.892 | 24.950 |
| LC-BLYP       | -7.344  | -75.147 | -64.106 | -48.041 | -19.649 | -42.857 | 2084.096 | 45.652 | 25.771 |
| BPW91         | -21.673 | 50.085  | 45.885  | 33.151  | 20.235  | 25.537  | 1098.686 | 33.146 | 25.813 |
| M06-HF        | 50.545  | 79.217  | 9.677   | 71.357  | 81.426  | 58.444  | 3440.954 | 58.660 | 26.710 |
| OPBE          | -26.213 | 51.861  | 48.426  | 16.103  | 16.422  | 21.320  | 1041.787 | 32.277 | 28.207 |
| BPBE-D3(BJ)   | -19.846 | 59.295  | 56.154  | 44.380  | 32.822  | 34.561  | 1685.001 | 41.049 | 28.767 |

---



**Table S2.** The average errors MSE, variances RMSE and the standard deviation of SE of BDE([Ru-H]<sup>+</sup>), BDE ([Ru-C]<sup>+</sup>), BDE ([Ru-CH]<sup>+</sup>), BDE ([Ru-CH<sub>2</sub>]<sup>+</sup>) and BDE ([Ru-CH<sub>3</sub>]<sup>+</sup>) for each computational method.

| method        | BCE(kJ/mol)         |                     |                      |                                    |                                    | average | analysis |        |                          |
|---------------|---------------------|---------------------|----------------------|------------------------------------|------------------------------------|---------|----------|--------|--------------------------|
|               | [Ru-H] <sup>+</sup> | [Ru-C] <sup>+</sup> | [Ru-CH] <sup>+</sup> | [Ru-CH <sub>2</sub> ] <sup>+</sup> | [Ru-CH <sub>3</sub> ] <sup>+</sup> |         | MSE      | RMSE   | standard deviation of SE |
| BRxp86        | 40.889              | -52.365             | 87.003               | 66.460                             | 55.665                             | 39.530  | 3249.836 | 57.007 | 48.344                   |
| mPWPBE        | 17.211              | -60.623             | 86.078               | 55.678                             | 43.687                             | 28.406  | 2731.581 | 52.265 | 49.709                   |
| PW91          | 19.316              | -51.508             | 94.824               | 63.318                             | 50.949                             | 35.380  | 3103.813 | 55.712 | 49.728                   |
| mPWPW91       | 17.107              | -63.093             | 83.479               | 54.085                             | 42.100                             | 26.736  | 2656.633 | 51.543 | 49.731                   |
| BPW91         | 15.944              | -72.114             | 74.821               | 46.916                             | 35.018                             | 20.117  | 2413.367 | 49.126 | 49.913                   |
| OPBE          | 19.794              | -69.126             | 83.279               | 41.051                             | 35.943                             | 22.188  | 2513.791 | 50.138 | 50.242                   |
| PBEHPBE       | 19.286              | -53.721             | 91.337               | 71.216                             | 49.126                             | 35.449  | 3180.913 | 56.400 | 50.601                   |
| BPBE-D3(BJ)   | 18.932              | -62.082             | 85.852               | 59.165                             | 48.486                             | 30.070  | 2905.736 | 53.905 | 50.820                   |
| BP86-D3(BJ)   | 31.989              | -49.441             | 95.947               | 81.779                             | 54.098                             | 42.874  | 3714.658 | 60.948 | 51.180                   |
| BLYP-D3(BJ)   | 16.410              | -82.572             | 61.359               | 66.940                             | 34.395                             | 19.306  | 2752.734 | 52.467 | 54.134                   |
| B2PLYP        | 66.858              | -68.816             | 63.490               | 66.790                             | 70.185                             | 39.701  | 3770.581 | 61.405 | 54.300                   |
| G96LYP        | 12.485              | -98.813             | 49.288               | 48.020                             | 16.562                             | 5.508   | 2488.233 | 49.882 | 54.365                   |
| B2PLYP-D3(BJ) | -21.252             | -154.042            | -21.398              | -16.986                            | -13.028                            | -45.341 | 4182.775 | 64.674 | 54.438                   |
| revTPSS       | 9.601               | -117.191            | 32.904               | 23.664                             | 23.469                             | -5.511  | 2669.889 | 51.671 | 56.334                   |
| TPSS-D3(BJ)   | 10.148              | -115.969            | 38.692               | 28.343                             | 24.905                             | -2.776  | 2745.415 | 52.397 | 57.331                   |
| B3P86         | 5.170               | -143.441            | 9.849                | 6.203                              | 9.160                              | -22.612 | 3470.234 | 58.909 | 60.440                   |
| mPW3PBE       | -3.461              | -151.085            | 2.115                | -2.200                             | 7.146                              | -29.497 | 3816.494 | 61.778 | 60.908                   |
| B3PW91-D3(BJ) | -2.051              | -153.304            | 0.801                | 0.270                              | 10.675                             | -28.722 | 3936.808 | 62.744 | 62.444                   |
| TPSSh         | -1.601              | -162.247            | -5.025               | -6.320                             | 1.422                              | -34.754 | 4398.969 | 66.325 | 63.804                   |
| PBE0-D3(BJ)   | -9.999              | -165.555            | -12.191              | -10.368                            | 6.841                              | -38.255 | 4635.222 | 68.082 | 64.022                   |
| mPW1PBE       | -12.851             | -177.084            | -22.471              | -20.684                            | -3.162                             | -47.250 | 5411.114 | 73.560 | 65.274                   |
| B971          | -38.821             | -168.771            | -8.238               | 10.120                             | -4.279                             | -41.998 | 5029.865 | 70.922 | 65.361                   |

|                  |         |          |          |         |          |          |           |         |        |
|------------------|---------|----------|----------|---------|----------|----------|-----------|---------|--------|
| mPW1PW91         | -12.982 | -179.723 | -25.218  | -22.330 | -4.774   | -49.005  | 5604.388  | 74.862  | 65.755 |
| B3LYP-D3(BJ)     | -4.120  | -173.002 | -22.629  | -0.373  | -9.060   | -41.837  | 5090.171  | 71.345  | 66.014 |
| X3LYP            | -4.991  | -176.933 | -26.321  | -1.754  | -8.418   | -43.683  | 5349.457  | 73.140  | 67.165 |
| SOGGA11-X        | -29.523 | -223.530 | -75.977  | -38.426 | -57.275  | -84.946  | 10227.818 | 101.133 | 71.116 |
| mPW1LYP          | 74.415  | -112.873 | 37.426   | 69.975  | 68.020   | 27.393   | 4866.978  | 69.764  | 71.344 |
| B1LYP            | -12.335 | -204.947 | -54.147  | -21.277 | -22.399  | -63.021  | 7673.654  | 87.599  | 72.365 |
| CAM-B3LYP-D3(BJ) | -11.248 | -205.817 | -48.510  | -18.284 | -16.047  | -59.981  | 7572.037  | 87.017  | 74.086 |
| $\omega$ B97     | 5.884   | -167.185 | 2.285    | 32.286  | 24.449   | -20.456  | 4938.485  | 70.274  | 74.214 |
| $\omega$ B97X    | -38.271 | -227.329 | -58.563  | -34.430 | -33.440  | -78.407  | 9812.717  | 99.059  | 75.018 |
| M06-HF           | -6.366  | -180.589 | -171.624 | -12.888 | -138.162 | -101.926 | 13560.399 | 116.449 | 76.705 |
| BMK-D3(BJ)       | -59.087 | -259.975 | -62.836  | -58.109 | -138.056 | -115.613 | 16243.819 | 127.451 | 78.270 |
| LC-BLYP          | -21.292 | -238.486 | -71.708  | -37.138 | -26.312  | -78.987  | 10757.049 | 103.716 | 81.667 |
| M11              | -28.481 | -238.311 | -191.953 | -37.059 | -38.131  | -106.787 | 16212.768 | 127.329 | 89.732 |

---

**Table S3.** Polarizability  $\alpha$  in Different Clusters as Calculated at the PBE0-D3(BJ)/def2-TZVP Level of Theory.

| clusters                       | spin state | $\alpha$ (a.u.) |
|--------------------------------|------------|-----------------|
| OsC <sup>+</sup>               | 2          | 26.5            |
|                                | 4          | 33.6            |
| OsCH <sup>+</sup>              | 1          | 39.2            |
|                                | 3          | 34.4            |
| OsCH <sub>2</sub> <sup>+</sup> | 2          | 34.0            |
|                                | 4          | 37.2            |
|                                | 6          | 38.1            |
| FeC <sup>+</sup>               | 2          | 20.1            |
|                                | 4          | 34.9            |
| FeCH <sup>+</sup>              | 3          | 24.9            |
|                                | 5          | 27.2            |
| FeCH <sub>2</sub> <sup>+</sup> | 2          | 30.2            |
|                                | 4          | 30.7            |
|                                | 6          | 31.6            |
| RuC <sup>+</sup>               | 2          | 22.2            |
|                                | 4          | 37.5            |
| RuCH <sup>+</sup>              | 1          | 24.8            |
|                                | 3          | 33.1            |
| RuCH <sub>2</sub> <sup>+</sup> | 2          | 28.6            |
|                                | 4          | 36.5            |

**Table S4.** Energy Gap (Activation Process with the Lowest Energy Barrier), Charge and Spin Density of M, Charge and Spin Density of C, Polarizability ( $\alpha$ ), Dipole Moment and the Ratio of Bond Length of M-C to Atomic Radius of M (M-C/M) in Different Clusters as Calculated at the PBE0-D3(BJ)/def2-TZVP Level of Theory. <sup>a</sup>

| clusters                       | spin state | energy gap (eV) | charge of M | spin density of M | charge of C | spin density of C | $\alpha$ (a.u.) | Dipole moment (a.u.) | M-C/M |
|--------------------------------|------------|-----------------|-------------|-------------------|-------------|-------------------|-----------------|----------------------|-------|
| OsC <sup>+</sup>               | 2          | 15.28           | 0.830       | 1.406             | 0.170       | -0.406            | 26.5            | 0.84                 | 0.47  |
|                                | 4          | 16.90           | 0.817       | 3.191             | 0.183       | -0.191            | 33.6            | 0.62                 | 0.47  |
| RuC <sup>+</sup>               | 2          | 17.29           | 0.712       | 1.252             | 0.288       | -0.252            | 22.2            | 0.85                 | 0.46  |
|                                | 4          | 16.97           | 0.714       | 3.058             | 0.286       | -0.058            | 37.5            | 0.59                 | 0.47  |
| FeC <sup>+</sup>               | 2          | 16.28           | 0.930       | 2.721             | 0.070       | -1.721            | 20.1            | 1.05                 | 0.47  |
|                                | 4          | 16.46           | 0.864       | 3.566             | 0.136       | -0.566            | 34.9            | 0.91                 | 0.46  |
| OsCH <sup>+</sup>              | 1          | 14.70           | 0.663       |                   | 0.094       |                   | 39.2            | 0.42                 | 0.42  |
|                                | 3          | 12.31           | 0.740       | 2.267             | 0.011       | -0.291            | 34.4            | 0.26                 | 0.42  |
| RuCH <sup>+</sup>              | 1          | 14.13           | 0.635       |                   | 0.125       |                   | 24.8            | 0.12                 | 0.41  |
|                                | 3          | 15.03           | 0.704       | 2.18              | 0.071       | -0.232            | 33.1            | 0.10                 | 0.42  |
| FeCH <sup>+</sup>              | 3          | 15.01           | 0.876       | 1.357             | -0.052      | 0.643             | 24.9            | 0.28                 | 0.43  |
|                                | 5          | 15.52           | 1.162       | 3.495             | -0.348      | 0.513             | 27.2            | 0.68                 | 0.43  |
| OsCH <sub>2</sub> <sup>+</sup> | 2          | 12.51           | 0.998       | 1.207             | -0.397      | -0.215            | 34.0            | 0.12                 | 0.47  |
|                                | 4          | 13.82           | 0.917       | 3.277             | -0.427      | -0.373            | 37.2            | 0.37                 | 0.47  |
| RuCH <sub>2</sub> <sup>+</sup> | 2          | 14.54           | 0.885       | 1.278             | -0.264      | -0.286            | 28.6            | 0.01                 | 0.46  |
|                                | 4          | 15.91           | 0.931       | 3.256             | -0.341      | -0.267            | 36.5            | 0.08                 | 0.47  |
| FeCH <sub>2</sub> <sup>+</sup> | 4          | 17.19           | 1.188       | 3.707             | -0.601      | -0.732            | 30.7            | 0.70                 | 0.47  |
|                                | 6          | 16.73           | 1.343       | 4.004             | -0.806      | 1.031             | 31.6            | 1.04                 | 0.48  |

<sup>a</sup>The dipole moment, M- C /M and spin density of M are the most significantly correlated with the energy gap, with correlation coefficients of 0.66, 0.45 and 0.44 respectively.

The multiple linear regression analysis (see Table S5) shows that the dipole moment, M-C/M and the spin density of M are the three important factors affecting the energy gap (activation process with the lowest energy barrier).

**Table S5.** The Multiple Linear Regression Analysis of Dipole Moment, M- C /M and Spin Density of M with Energy Gap.<sup>a</sup>

|                   | coefficients |            | collinearity statistics |       |
|-------------------|--------------|------------|-------------------------|-------|
|                   | B            | Std. Error | tolerance               | VIF   |
| dipole moment     | 0.505        | 0.236      | 0.742                   | 1.348 |
| spin density of M | 0.205        | 0.229      | 0.828                   | 1.207 |
| M-C/M             | 0.190        | 0.258      | 0.831                   | 1.20  |

<sup>a</sup>All data have been standardized before linear regression analysis; <sup>b</sup>Linear regression through the origin,  $R^2=0.477$  ( $R^2$  measures the proportion of the variability in the dependent variable about the origin explained by regression).

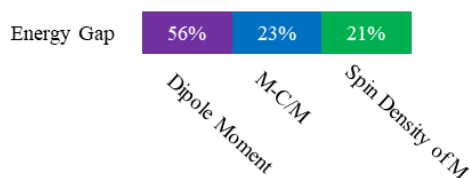

**Figure S21** Schematic diagram of the effects of dipole moment, M-C/M and the spin density of M on the energy gap (activation process with the lowest energy barrier)

**Table S6.** Selected Mulliken Spin Populations for  $^4[\text{OsC}]^+$ .

| method      | Os    | C      |
|-------------|-------|--------|
| PBE0-D3(BJ) | 3.299 | -0.299 |
| OPBE        | 3.292 | -0.292 |
| BP86        | 3.197 | -0.197 |
| BLYP-D3(BJ) | 3.138 | -0.138 |
| TPSS-D3(BJ) | 3.254 | -0.254 |
| TPSSh       | 3.284 | -0.284 |
| B3LYP       | 3.198 | -0.198 |
| CCSD(T)     | 3.227 | -0.227 |

**Table S7.** Selected Mulliken Spin Populations for  $^3[\text{OsCH}]^+$ .

| method      | Os    | C      | H     |
|-------------|-------|--------|-------|
| PBE0-D3(BJ) | 2.330 | -0.357 | 0.026 |
| OPBE        | 2.268 | -0.296 | 0.028 |
| BP86        | 2.204 | -0.226 | 0.022 |
| BLYP-D3(BJ) | 2.187 | -0.207 | 0.020 |
| TPSS-D3(BJ) | 2.246 | -0.027 | 0.022 |
| TPSSh       | 2.288 | -0.312 | 0.024 |
| B3LYP       | 2.249 | -0.271 | 0.022 |
| CCSD(T)     | 2.249 | -0.273 | 0.024 |

**Table S8.** Selected Mulliken Spin Populations for  $^4[\text{OsCH}_2]^+$ .

| method      | Os    | C      |
|-------------|-------|--------|
| PBE0-D3(BJ) | 3.339 | -0.429 |
| OPBE        | 3.239 | -0.328 |
| BP86        | 3.169 | -0.258 |
| BLYP-D3(BJ) | 3.142 | -0.230 |
| TPSS-D3(BJ) | 3.233 | -0.323 |
| TPSSh       | 3.289 | -0.380 |
| B3LYP       | 3.239 | -0.324 |
| CCSD(T)     | 3.253 | -0.365 |

**Table S9.** Selected Mulliken Spin Populations for  $^5[\text{OsCH}_3]^+$ .

| method      | Os    | C      |
|-------------|-------|--------|
| PBE0-D3(BJ) | 4.033 | -0.140 |
| OPBE        | 3.997 | -0.066 |
| BP86        | 3.962 | -0.053 |
| BLYP-D3(BJ) | 3.945 | -0.046 |
| TPSS-D3(BJ) | 3.996 | -0.083 |
| TPSSh       | 4.092 | -0.203 |
| B3LYP       | 4.033 | -0.140 |
| CCSD(T)     | 4.065 | -0.141 |

**Table S10.** The T1 diagnostic for PESs at the DLPNO-CCSD(T)/def2-TZVPP level of theory.

| PESs                   | T1 diagnostic | PEs                   | T1 diagnostic | PEs                  | T1 diagnostic |
|------------------------|---------------|-----------------------|---------------|----------------------|---------------|
| <sup>2</sup> R1        | 0.0215        | <sup>1</sup> R4       | 0.0154        | <sup>3</sup> 17'     | 0.0269        |
| <sup>2</sup> 1         | 0.0201        | <sup>1</sup> 12       | 0.0159        | <sup>1</sup> R6      | 0.0173        |
| <sup>2</sup> TS1/2     | 0.0192        | <sup>1</sup> TS12/14  | 0.0177        | <sup>1</sup> 21      | 0.0185        |
| <sup>2</sup> 2         | 0.0207        | <sup>1</sup> 14       | 0.0156        | <sup>1</sup> TS21/22 | 0.0143        |
| <sup>2</sup> TS2/3     | 0.0199        | <sup>1</sup> TS14/15  | 0.0181        | <sup>1</sup> 22      | 0.0191        |
| <sup>2</sup> 3         | 0.0205        | <sup>1</sup> 15       | 0.0139        | <sup>3</sup> R6      | 0.0585        |
| <sup>2</sup> TS3/4     | 0.0185        | <sup>1</sup> P2       | 0.0146        | <sup>3</sup> 21      | 0.0520        |
| <sup>2</sup> 4         | 0.0172        | <sup>1</sup> P3       | 0.0186        | <sup>3</sup> TS21/22 | 0.0340        |
| <sup>2</sup> TS4/5     | 0.0178        | <sup>3</sup> R4       | 0.0185        | <sup>3</sup> 22      | 0.0434        |
| <sup>2</sup> 5         | 0.0185        | <sup>3</sup> 11       | 0.0250        | <sup>3</sup> TS22/23 | 0.0343        |
| <sup>2</sup> TS5/6     | 0.0184        | <sup>3</sup> TS11/12  | 0.0194        | <sup>3</sup> 23      | 0.0304        |
| <sup>2</sup> 6         | 0.0167        | <sup>3</sup> 12       | 0.0206        | <sup>3</sup> TS23/24 | 0.0272        |
| <sup>2</sup> P1        | 0.0175        | <sup>3</sup> TS12/13  | 0.0221        | <sup>3</sup> 24      | 0.0279        |
| <sup>2</sup> TS2/4     | 0.0191        | <sup>3</sup> 13       | 0.0236        | <sup>3</sup> TS24/25 | 0.0265        |
| <sup>2</sup> TS1/3     | 0.0181        | <sup>3</sup> TS13/14  | 0.0232        | <sup>3</sup> 25      | 0.0556        |
| <sup>4</sup> R1        | 0.0251        | <sup>3</sup> 14       | 0.0252        | <sup>3</sup> P6      | 0.0585        |
| <sup>4</sup> 1         | 0.0263        | <sup>3</sup> TS14/15  | 0.0207        | <sup>3</sup> P7      | 0.0252        |
| <sup>4</sup> TS1/2     | 0.0241        | <sup>3</sup> 15       | 0.0196        | <sup>5</sup> R6      | 0.0311        |
| <sup>4</sup> 2         | 0.0235        | <sup>3</sup> P2       | 0.0190        | <sup>5</sup> 21      | 0.0295        |
| <sup>4</sup> 6         | 0.0213        | <sup>3</sup> P3       | 0.0387        | <sup>5</sup> TS21/22 | 0.0293        |
| <sup>4</sup> P1        | 0.0206        | <sup>3</sup> TS11/12' | 0.0200        | <sup>5</sup> 22      | 0.0313        |
| <sup>4</sup> TS1/3     | 0.0259        | <sup>3</sup> 12'      | 0.0331        | <sup>2</sup> R7      | 0.0140        |
| <sup>2</sup> R2        | 0.0174        | <sup>1</sup> R5       | 0.0114        | <sup>2</sup> 26      | 0.0197        |
| <sup>2</sup> 7         | 0.0214        | <sup>1</sup> 16       | 0.0181        | <sup>2</sup> TS26/27 | 0.0191        |
| <sup>2</sup> TS7/8     | 0.0190        | <sup>1</sup> TS16/17  | 0.0162        | <sup>2</sup> 27      | 0.0184        |
| <sup>2</sup> 8         | 0.0178        | <sup>1</sup> 17       | 0.0155        | <sup>2</sup> TS27/28 | 0.0216        |
| <sup>4</sup> R2        | 0.0237        | <sup>1</sup> TS17/18  | 0.0175        | <sup>2</sup> 28      | 0.0180        |
| <sup>4</sup> 7         | 0.0269        | <sup>1</sup> 18       | 0.0180        | <sup>2</sup> TS28/29 | 0.0192        |
| <sup>4</sup> TS7/8     | 0.0235        | <sup>1</sup> TS18/19  | 0.0160        | <sup>2</sup> 29      | 0.0208        |
| <sup>4</sup> 8         | 0.0234        | <sup>1</sup> 19       | 0.0155        | <sup>2</sup> TS29/30 | 0.0216        |
| <sup>4</sup> TS7'/8'   | 0.0248        | <sup>1</sup> TS19/20  | 0.0190        | <sup>2</sup> 30      | 0.0187        |
| <sup>4</sup> 8'        | 0.0284        | <sup>1</sup> 20       | 0.0156        | <sup>2</sup> TS30/31 | 0.0202        |
| <sup>2</sup> R3        | 0.0313        | <sup>1</sup> P4       | 0.0195        | <sup>2</sup> 31      | 0.0189        |
| <sup>2</sup> 9         | 0.0280        | <sup>1</sup> P5       | 0.0205        | <sup>2</sup> P8      | 0.0264        |
| <sup>2</sup> TS9/10    | 0.0223        | <sup>3</sup> R5       | 0.0200        | <sup>4</sup> R7      | 0.0390        |
| <sup>2</sup> 10        | 0.0305        | <sup>3</sup> 16       | 0.0213        | <sup>4</sup> 26      | 0.0282        |
| <sup>4</sup> R3        | 0.0371        | <sup>3</sup> TS16/17  | 0.0199        | <sup>4</sup> TS26/27 | 0.0213        |
| <sup>4</sup> 9         | 0.0337        | <sup>3</sup> 17       | 0.0201        | <sup>4</sup> 27      | 0.0216        |
| <sup>4</sup> TS9/10    | 0.0317        | <sup>3</sup> TS17/18  | 0.0219        | <sup>4</sup> TS27/28 | 0.0249        |
| <sup>4</sup> 10        | 0.0334        | <sup>3</sup> 18       | 0.0279        | <sup>4</sup> 28      | 0.0222        |
| <sup>4</sup> [TS9/10]' | 0.0370        | <sup>3</sup> TS16/17' | 0.0195        | <sup>4</sup> TS28/29 | 0.0245        |

**Table S11.** The T1 diagnostic for PESs at the DLPNO-CCSD(T)/def2-TZVPP level of theory.

| PESs                 | T1 diagnostic | PEs                  | T1 diagnostic |
|----------------------|---------------|----------------------|---------------|
| <sup>4</sup> 29      | 0.0226        | <sup>2</sup> TS37/38 | 0.0199        |
| <sup>4</sup> TS29/30 | 0.0240        | <sup>2</sup> 38      | 0.0194        |
| <sup>4</sup> 30      | 0.0218        | <sup>2</sup> P9      | 0.0254        |
| <sup>4</sup> TS30/31 | 0.0262        | <sup>4</sup> R8      | 0.0317        |
| <sup>4</sup> 31      | 0.0244        | <sup>4</sup> 34      | 0.0294        |
| <sup>4</sup> P8      | 0.0221        | <sup>4</sup> TS34/35 | 0.0246        |
| <sup>4</sup> TS26/29 | 0.0232        | <sup>4</sup> 35      | 0.0249        |
| <sup>4</sup> TS29/32 | 0.0240        | <sup>4</sup> TS35/36 | 0.0261        |
| <sup>4</sup> 32      | 0.0302        | <sup>4</sup> 36      | 0.0250        |
| <sup>4</sup> TS32/33 | 0.0230        | <sup>4</sup> TS36/37 | 0.0254        |
| <sup>4</sup> 33      | 0.0247        | <sup>4</sup> 37      | 0.0247        |
| <sup>4</sup> TS33/31 | 0.0246        | <sup>4</sup> 38      | 0.0274        |
| <sup>6</sup> R7      | 0.0223        | <sup>2</sup> R9      | 0.0382        |
| <sup>6</sup> 26      | 0.0246        | <sup>2</sup> 39      | 0.0311        |
| <sup>6</sup> TS26/29 | 0.0257        | <sup>2</sup> TS39/40 | 0.0303        |
| <sup>6</sup> 29      | 0.0245        | <sup>2</sup> 40      | 0.0197        |
| <sup>2</sup> R8      | 0.0188        | <sup>4</sup> R9      | 0.0521        |
| <sup>2</sup> 34      | 0.0222        | <sup>4</sup> 39      | 0.0475        |
| <sup>2</sup> TS34/35 | 0.0214        | <sup>4</sup> TS39/40 | 0.0314        |
| <sup>2</sup> 35      | 0.0244        | <sup>4</sup> 40      | 0.0299        |
| <sup>2</sup> TS35/36 | 0.0228        | <sup>6</sup> R9      | 0.0308        |
| <sup>2</sup> 36      | 0.0267        | <sup>6</sup> 39      | 0.0316        |
| <sup>2</sup> TS36/37 | 0.0213        | <sup>6</sup> TS39/40 | 0.0296        |
| <sup>2</sup> 37      | 0.0203        | <sup>6</sup> 40      | 0.0262        |



**Table S12.** The C ( $C = \langle S^2 \rangle - \langle S^2 \rangle_{\text{ideal}}$ ) for PESs at the DLPNO-CCSD(T)/def2-TZVPP level of theory.

| PESs                   | C      | PESs                  | C      | PESs                 | C      |
|------------------------|--------|-----------------------|--------|----------------------|--------|
| <sup>2</sup> R1        | 0.0141 | <sup>1</sup> R4       | 0.0000 | <sup>3</sup> 17'     | 0.0083 |
| <sup>2</sup> 1         | 0.0018 | <sup>1</sup> 12       | 0.0000 | <sup>1</sup> R6      | 0.0000 |
| <sup>2</sup> TS1/2     | 0.0015 | <sup>1</sup> TS12/14  | 0.0000 | <sup>1</sup> 21      | 0.0000 |
| <sup>2</sup> 2         | 0.0021 | <sup>1</sup> 14       | 0.0000 | <sup>1</sup> TS21/22 | 0.0000 |
| <sup>2</sup> TS2/3     | 0.0019 | <sup>1</sup> TS14/15  | 0.0000 | <sup>1</sup> 22      | 0.0000 |
| <sup>2</sup> 3         | 0.0034 | <sup>1</sup> 15       | 0.0000 | <sup>3</sup> R6      | 0.2320 |
| <sup>2</sup> TS3/4     | 0.0005 | <sup>1</sup> P2       | 0.0000 | <sup>3</sup> 21      | 0.2157 |
| <sup>2</sup> 4         | 0.0009 | <sup>1</sup> P3       | 0.0000 | <sup>3</sup> TS21/22 | 0.0704 |
| <sup>2</sup> TS4/5     | 0.0015 | <sup>3</sup> R4       | 0.0041 | <sup>3</sup> 22      | 0.1356 |
| <sup>2</sup> 5         | 0.0024 | <sup>3</sup> 11       | 0.0112 | <sup>3</sup> TS22/23 | 0.0693 |
| <sup>2</sup> TS5/6     | 0.0019 | <sup>3</sup> TS11/12  | 0.0018 | <sup>3</sup> 23      | 0.0454 |
| <sup>2</sup> 6         | 0.0008 | <sup>3</sup> 12       | 0.0018 | <sup>3</sup> TS23/24 | 0.0212 |
| <sup>2</sup> P1        | 0.0017 | <sup>3</sup> TS12/13  | 0.0037 | <sup>3</sup> 24      | 0.0208 |
| <sup>2</sup> TS2/4     | 0.0011 | <sup>3</sup> 13       | 0.0047 | <sup>3</sup> TS24/25 | 0.0150 |
| <sup>2</sup> TS1/3     | 0.0009 | <sup>3</sup> TS13/14  | 0.0055 | <sup>3</sup> 25      | 0.2415 |
| <sup>4</sup> R1        | 0.0083 | <sup>3</sup> 14       | 0.0050 | <sup>3</sup> P6      | 0.2718 |
| <sup>4</sup> 1         | 0.0064 | <sup>3</sup> TS14/15  | 0.0014 | <sup>3</sup> P7      | 0.0181 |
| <sup>4</sup> TS1/2     | 0.0048 | <sup>3</sup> 15       | 0.0016 | <sup>5</sup> R6      | 0.0477 |
| <sup>4</sup> 2         | 0.0030 | <sup>3</sup> P2       | 0.0019 | <sup>5</sup> 21      | 0.0466 |
| <sup>4</sup> 6         | 0.0025 | <sup>3</sup> P3       | 0.0127 | <sup>5</sup> TS21/22 | 0.0267 |
| <sup>4</sup> P1        | 0.0031 | <sup>3</sup> TS11/12' | 0.0026 | <sup>5</sup> 22      | 0.0176 |
| <sup>4</sup> TS1/3     | 0.0059 | <sup>3</sup> 12'      | 0.0095 | <sup>2</sup> R7      | 0.8761 |
| <sup>2</sup> R2        | 0.0051 | <sup>1</sup> R5       | 0.0000 | <sup>2</sup> 26      | 0.0017 |
| <sup>2</sup> 7         | 0.0028 | <sup>1</sup> 16       | 0.0000 | <sup>2</sup> TS26/27 | 0.0013 |
| <sup>2</sup> TS7/8     | 0.0012 | <sup>1</sup> TS16/17  | 0.0000 | <sup>2</sup> 27      | 0.0011 |
| <sup>2</sup> 8         | 0.0014 | <sup>1</sup> 17       | 0.0000 | <sup>2</sup> TS27/28 | 0.0018 |
| <sup>4</sup> R2        | 0.0100 | <sup>1</sup> TS17/18  | 0.0000 | <sup>2</sup> 28      | 0.0006 |
| <sup>4</sup> 7         | 0.0082 | <sup>1</sup> 18       | 0.0000 | <sup>2</sup> TS28/29 | 0.0010 |
| <sup>4</sup> TS7/8     | 0.0051 | <sup>1</sup> TS18/19  | 0.0000 | <sup>2</sup> 29      | 0.0018 |
| <sup>4</sup> 8         | 0.0041 | <sup>1</sup> 19       | 0.0000 | <sup>2</sup> TS29/30 | 0.0018 |
| <sup>4</sup> TS7'/8'   | 0.0046 | <sup>1</sup> TS19/20  | 0.0000 | <sup>2</sup> 30      | 0.0004 |
| <sup>4</sup> 8'        | 0.0035 | <sup>1</sup> 20       | 0.0000 | <sup>2</sup> TS30/31 | 0.0007 |
| <sup>2</sup> R3        | 0.0561 | <sup>1</sup> P4       | 0.0000 | <sup>2</sup> 31      | 0.0009 |
| <sup>2</sup> 9         | 0.0384 | <sup>1</sup> P5       | 0.0000 | <sup>2</sup> P8      | 0.0033 |
| <sup>2</sup> TS9/10    | 0.0178 | <sup>3</sup> R5       | 0.0055 | <sup>4</sup> R7      | 0.0135 |
| <sup>2</sup> 10        | 0.0584 | <sup>3</sup> 16       | 0.0052 | <sup>4</sup> 26      | 0.0112 |
| <sup>4</sup> R3        | 0.0801 | <sup>3</sup> TS16/17  | 0.0018 | <sup>4</sup> TS26/27 | 0.0021 |
| <sup>4</sup> 9         | 0.0641 | <sup>3</sup> 17       | 0.0018 | <sup>4</sup> 27      | 0.0034 |
| <sup>4</sup> TS9/10    | 0.0437 | <sup>3</sup> TS17/18  | 0.0035 | <sup>4</sup> TS27/28 | 0.0028 |
| <sup>4</sup> 10        | 0.0488 | <sup>3</sup> 18       | 0.0064 | <sup>4</sup> 28      | 0.0029 |
| <sup>4</sup> [TS9/10]' | 0.0837 | <sup>3</sup> TS16/17' | 0.0024 | <sup>4</sup> TS28/29 | 0.0036 |

**Table S13.** The C ( $C = \langle S^2 \rangle - \langle S^2 \rangle_{\text{ideal}}$ ) for PESs at the DLPNO-CCSD(T)/def2-TZVPP level of theory.

| PESs                 | C      | PEs                  | C      |
|----------------------|--------|----------------------|--------|
| <sup>4</sup> 29      | 0.0014 | <sup>2</sup> TS37/38 | 0.0013 |
| <sup>4</sup> TS29/30 | 0.0023 | <sup>2</sup> 38      | 0.0010 |
| <sup>4</sup> 30      | 0.0026 | <sup>2</sup> P9      | 0.0206 |
| <sup>4</sup> TS30/31 | 0.0048 | <sup>4</sup> R8      | 0.0220 |
| <sup>4</sup> 31      | 0.0031 | <sup>4</sup> 34      | 0.0186 |
| <sup>4</sup> P8      | 0.0033 | <sup>4</sup> TS34/35 | 0.0026 |
| <sup>4</sup> TS26/29 | 0.0026 | <sup>4</sup> 35      | 0.0028 |
| <sup>4</sup> TS29/32 | 0.0023 | <sup>4</sup> TS35/36 | 0.0032 |
| <sup>4</sup> 32      | 0.0040 | <sup>4</sup> 36      | 0.0032 |
| <sup>4</sup> TS32/33 | 0.0028 | <sup>4</sup> TS36/37 | 0.0018 |
| 433                  | 0.0031 | <sup>4</sup> 37      | 0.0023 |
| <sup>4</sup> TS33/31 | 0.0042 | <sup>4</sup> 38      | 0.0024 |
| <sup>6</sup> R7      | 0.0015 | <sup>2</sup> R9      | 0.1099 |
| <sup>6</sup> 26      | 0.0011 | <sup>2</sup> 39      | 0.0553 |
| <sup>6</sup> TS26/29 | 0.0015 | <sup>2</sup> TS39/40 | 0.0565 |
| <sup>6</sup> 29      | 0.0011 | <sup>2</sup> 40      | 1.1865 |
| <sup>2</sup> R8      | 0.0050 | <sup>4</sup> R9      | 0.1698 |
| <sup>2</sup> 34      | 0.0032 | <sup>4</sup> 39      | 0.1629 |
| <sup>2</sup> TS34/35 | 0.0024 | <sup>4</sup> TS39/40 | 0.0379 |
| <sup>2</sup> 35      | 0.0025 | <sup>4</sup> 40      | 0.0341 |
| <sup>2</sup> TS35/36 | 0.0022 | <sup>6</sup> R9      | 0.0044 |
| <sup>2</sup> 36      | 0.0129 | <sup>6</sup> 39      | 0.0033 |
| <sup>2</sup> TS36/37 | 0.0005 | <sup>6</sup> TS39/40 | 0.0028 |
| <sup>2</sup> 37      | 0.0013 | <sup>6</sup> 40      | 0.0019 |

## Reference

- (1) Yu, M.; Ge, X.; Zhou, S. On the Origins of the Mechanistic Variants in the Thermal Reactions of  $S_x^+$  ( $X = 1-3$ ) with Benzene. *Phys Chem Chem Phys* **2021**, *23*, 17512-17520.
- (2) Yu, M.; Ruan, J.; Qian, C.; Chen, X.; Ge, X.; Zhou, S. On the Electronic Origins of the Different Behaviors of  $S^+$  and  $S_2^{+/2+}$  in Methane Activation. *ChemistrySelect* **2020**, *5*, 12764-12769.
- (3) Frisch, M. J.; Trucks, G. W.; Schlegel, H. B.; Scuseria, G. E.; Robb, M. A.; Cheeseman, J. R.; Scalmani, G.; Barone, V.; Mennucci, B.; Petersson, G. A.; Nakatsuji, H.; Caricato, M.; Li, X.; Hratchian, H. P.; Izmaylov, A. F.; Bloino, J.; Zheng, G.; Sonnenberg, J. L.; Hada, M.; Ehara, S.; Toyota, K.; Fukuda, R.; Hasegawa, J.; Ishida, M.; Nakajima, T.; Honda, Y.; Kitao, O.; Nakai, H.; Vreven, T.; Montgomery Jr., J. A.; Peralta, J. E.; Ogliaro, F.; Bearpark, M.; Heyd, J. J.; Brothers, E.; Kudin, K. N.; Staroverov, V. N.; Kobayashi, R.; Normand, J.; Raghavachari, K.; Rendell, A.; Burant, J. C.; Iyengar, S. S.; Tomasi, J.; Cossi, M.; Rega, N.; Millam, J. M.; Klene, M.; Knox, J. E.; Cross, J. B.; Bakken, V.; Adamo, C.; Jaramillo, J.; Gomperts, R.; Stratmann, R. E.; Yazyev, O.; Austin, A. J.; Cammi, R.; Pomelli, C.; Ochterski, J. W.; Martin, R. L.; Morokuma, K.; Zakrzewski, V. G.; Voth, G. A.; Salvador, P.; Dannenberg, J. J.; Dapprich, S.; Daniels, A. D.; Farkas, O.; Foresman, J. B.; Ortiz, J. V.; Cioslowski, J.; Fox, D. J. Gaussian 09, Revision A.02; Gaussian Inc., Wallingford, CT; **2009**.
- (4) Neese, F. Software Update: The ORCA Program System-Version 5.0. *Wiley Interdiscip. Rev. Comput. Mol. Sci.* **2022**, *12*, e1606.
- (5) Schlegel, H. P.; Schlegel, H. B. Using Hessian Updating to Increase the Efficiency of a Hessian Based Predictor-Corrector Reaction Path Following Method. *J. Chem. Theory Comput.* **2005**, *1*, 61-69.
- (6) Truhlar, D. G.; Kilpatrick, N. J.; Garrett, B. C. Reaction - Path Interpolation Models for Variational Transition State Theory. *J. Chem. Phys.* **1983**, *78*, 2438-2442.
- (7) Fukui, K. The Path of Chemical Reactions - The IRC Approach. *Acc. Chem. Res.* **1981**, *14*, 363-368.
- (8) Reed, A. E.; Curtiss, L. A.; Weinhold, F. Intermolecular Interactions from a Natural Bond Orbital, Donor-Acceptor Viewpoint *Chem. Rev.* **1988**, *88*, 899-926.
- (9) Carpenter, J. E.; Weinhold, F. Analysis of the Geometry of the Hydroxymethyl Radical by the "Different Hybrids for Different Spins" Natural Bond Orbital Procedure. *J. Mol. Struct-Theochem* **1988**, *46*, 41-62.
- (10) Reed, A. E.; Weinhold, F. Natural Localized Molecular Orbitals. *J. Chem. Phys.* **1985**, *83*, 1736-1740.
- (11) Reed, A. E.; Weinstock, R. B.; Weinhold, F. Natural Population Analysis. *J. Chem. Phys.* **1985**, *83*, 735-746.
- (12) Reed, A. E.; Weinhold, F. Natural Bond Orbital Analysis of Near-Hartree-Fock Water Dimer. *J. Chem. Phys.* **1983**, *78*, 4066-4073.
- (13) Weinhold, J. P.; Weinhold, F. Natural Hybrid Orbitals. *J. Am. Chem. Soc* **1980**, *102*, 7211-7218.
- (14) Lu, T.; Chen, F., Multiwfn: A Multifunctional Wavefunction Analyzer. *J Comput Chem* **2012**, *33*, 580-592.
